# Supplementary material for: Acquisition of the L452R Mutation in the ACE2-Binding Interface of Spike Protein Triggers Recent Massive Expansion of SARS-CoV-2 Variants
Source: PubMed Central journal article supplement (PMC8525575; doi:10.1128/jcm.00921-21), 2021-10-19
Supplement: jcm.00921-21-s0007.pdf [file jcm.00921-21-s0007.pdf]

\* Region 1 (R1, aa414-583)

>R1\_1

ATGTTTGTGTTTTCTTGTTTTATTGCCACTAGTCTCTAGTCAGTGTGTTAATCTTACAACCAGAACTCAATTAC  
CCCCTGCATACACTAATTCTTTCACACGTGGTGTGTTATTACCCTGACAAAGTTTTTCAGATCCTCAGTTTTTACA  
TTCAACTCAGGACTTGTTCTTACCTTTCTTTTCCAATGTTACTTGGTTCCATGCTATAACATGTCTCTGGGACC  
AATGGTACTAAGAGGTTTGATAACCCTGTCCTACCATTTAATGATGGTGTGTTATTTTGTCTCCACTGAGAAGT  
CTAACATAATAAGAGGCTGGATTTTTGGTACTACTTTAGATTTCGAAGACCCAGTCCCTACTTATTGTTAATAA  
CGCTACTAATGTTGTTATTAAAGTCTGTGAATTTCAATTTTGTAAATGATCCATTTTTGGGTGTTTTATTACCAC  
AAAAACAACAAAAGTTGGATGGAAAGTGAGTTCAGAGTTTATTCTAGTGCGAATAATTGCACTTTTGAATATG  
TCTCTCAGCCTTTTCTTATGGACCTTGAAGGAAAACAGGGTAATTTCAAAAATCTTAGGGAATTTGTGTTTAA  
GAATATTGATGGTTATTTTAAAATATATTCTAAGCACACGCCTATTAATTTAGTGCGTGATCTCCCTCAGGGT  
TTTTCGGCTTTAGAACCATTTGGTAGATTTGCCAATAGGTATTAACATCACTAGGTTTTCAAACCTTACTTGCTT  
TACATAGAAGTTATTTGACTCCTGGTGATTCTTCTTCAGGTTGGACAGCTGGTGCTGCAGCTTATTATGTGGG  
TTATCTTCAACCTAGGACTTTTCTATTAAAATATAATGAAAATGGAACCATTACAGATGCTGTAGACTGTGCA  
CTTGACCCTCTCTCAGAAACAAAGTGTACGTTGAAATCCTTCACTGTAGAAAAAGGAATCTATCAAACCTTCTA  
ACTTTAGAGTCCAACCAACAGAATCTATTGTTAGATTTCTTAATATTACAAACTTGTGCCCTTTTGGTGAAGT  
TTTTAACGCCACCAGATTTGCATCTGTTTATGCTTGGAACAGGAAGAGAATCAGCAACTGTGTTGCTGATTAT  
TCTGTCCATATAAATCCGCATCATTTTCCACTTTTAAAGTGTATGGAGTGTCTCCTACTAAATTAATGATC  
TCTGCTTTACTAATGTCTATGCAGATTCATTTGTAATTAGAGGTGATGAAGTCAGACAAATCGCTCCAGGGCA  
AACTGGAAAGATTGCTGATTATAATTATAAATTACCAGATGATTTTACAGGCTGCCTTATAGCTTGGAAATCT  
ACAATCTTGATTCTAAGGTTGGTGGTAATTATAATTACCTGTATAGATTGTTTAGGAAGTCTAATCTCAAAC  
CTTTTGAGAGAGATATTTCAACTGAAATCTATCAGGCCGGTAGCACACCTTGTAAATGGTGTGGAAGTTTTAA  
TTGTTACTTTTCTTTACAATCATATGGTTTTCAACCCACTAATGGTGTGGTTACCAACCATACAGAGTAGTA  
GTACTTTCTTTTGAACTTCTACATGCACCAGCAACTGTTTGTGGACCTAAAAAGTCTACTAATTTGGTTAAAA  
ACAAATGTGTCAATTTCAACTTCAATGGTTTTAACAGGCACAGGTGTTCTTACTGAGTCTAACAAAAAGTTTCT  
GCCTTTCCAACAATTTGGCAGAGACATTGCTGACACTACTGATGCTGTCCGTGATCCACAGACACTTGAGATT  
CTTGACATTACACCATGTTCTTTTGGTGGTGTGAGTGTATAACACCAGGAACAAATACTTCTAACCAGGTTG  
CTGTTCTTTATCAGGATGTTAACTGCACAGAAGTCCCTGTTGCTATTTCATGCAGATCAACTTACTCCTACTTG  
GCGTGTGTTATTCTACAGGTTCTAATGTTTTTCAAACACGTGCAGGCTGTTTAATAGGGGCTGAACATGTCAAC  
AACTCATATGAGTGTGACATACCCATTGGTGCAGGTATATGCGCTAGTTATCAGACTCAGACTAATTTCTCCTC  
GGCGGGCACGTAGTGTAGCTAGTCAATCCATCATTGCCACACTATGTCACTTGGTGCAGAAAATTCAGTTGC  
TTACTCTAATAACTCTATTGCCATACCCACAAATTTTACTATTAGTGTACCACAGAAAATTCACCAGTGTCT  
ATGACCAAGACATCAGTAGATTGTACAATGTACATTTGTGGTGAATCAACTGAATGCAGCAATCTTTTGTGTC  
AATATGGCAGTTTTTGTACACAATTAACCGTGCTTTAACTGGAATAGCTGTTGAACAAGACAAAAACCCCA  
AGAAGTTTTTGCACAAGTCAAACAAATTTACAAAACACCACCAATTAAGATTTTTGGTGGTTTTAATTTTTTCA  
CAAATATTACCAGATCCATCAAACCAAGCAAGAGGTCAATTTATTGAAGATCTACTTTTCAACAAAGTGACAC  
TTGCAGATGCTGGCTTCATCAAACAATATGGTGATTGCCTTGGTGATATTGCTGCTAGAGACCTCATTTGTGC  
ACAAAAGTTTAAACGGCTTACTGTTTTGCCACCTTTGCTCACAGA

>R1\_2

ATGTTTGTGTTTTCTTGTTTTATTGCCACTAGTCTCTAGTCAGTGTGTTAATCTTACAACCAGAACTCAATTAC  
CCCCTGCATACACTAATTCTTTCACACGTGGTGTGTTATTACCCTGACAAAGTTTTTCAGATCCTCAGTTTTTACA  
TTCAACTCAGGACTTGTTCTTACCTTTCTTTTCCAATGTTACTTGGTTCCATGCTATAACATGTCTCTGGGACC  
AATGGTACTAAGAGGTTTGATAACCCTGTCCTACCATTTAATGATGGTGTGTTATTTTGTCTCCACTGAGAAGT  
CTAACATAATAAGAGGCTGGATTTTTGGTACTACTTTAGATTTCGAAGACCCAGTCCCTACTTATTGTTAATAA  
CGCTACTAATGTTGTTATTAAAGTCTGTGAATTTCAATTTTGTAAATGATCCATTTTTGGGTGTTTTATTACCAC  
AAAAACAACAAAAGTTGGATGGAAAGTGAGTTCAGAGTTTATTCTAGTGCGAATAATTGCACTTTTGAATATG  
TCTCTCAGCCTTTTCTTATGGACCTTGAAGGAAAACAGGGTAATTTCAAAAATCTTAGGGAATTTGTGTTTAA  
GAATATTGATGGTTATTTTAAAATATATTCTAAGCACACGCCTATTAATTTAGTGCGTGATCTCCCTCAGGGT  
TTTTCGGCTTTAGAACCATTTGGTAGATTTGCCAATAGGTATTAACATCACTAGGTTTTCAAACCTTACTTGCTT  
TACATAGAAGTTATTTGACTCCTGGTGATTCTTCTTCAGGTTGGACAGCTGGTGCTGCAGCTTATTATGTGGG  
TTATCTTCAACCTAGGACTTTTCTATTAAAATATAATGAAAATGGAACCATTACAGATGCTGTAGACTGTGCA  
CTTGACCCTCTCTCAGAAACAAAGTGTACGTTGAAATCCTTCACTGTAGAAAAAGGAATCTATCAAACCTTCTA  
ACTTTAGAGTCCAACCAACAGAATCTATTGTTAGATTTCTTAATATTACAAACTTGTGCCCTTTTGGTGAAGT  
TTTTAACGCCACCAGATTTGCATCTGTTTATGCTTGGAACAGGAAGAGAATCAGCAACTGTGTTGCTGATTAT

TCTGTCCTATATAATTCCGCATCATTTTCCACTTTTAAGTGTATGGAGTGTCTCCTACTAAATTAATGATC  
TCTGCTTTACTAATGTCTATGCAGATTCATTTGTAATTAGAGGTGATGAAGTCAGACAAATCGCTCCAGGGCA  
AACTGGAAAGATTGCTGATTATAATTATAAATTACCAGATGATTTTACAGGCTGCGTTATAGCTTGGAAATTCT  
ACAATCTTGATTCTAAGGTTGGTGGTAATTATAATTACCTGTATAGATTGTTTAGGAAGTCTAATCTCAAAC  
CTTTTGAGAGAGATATTTCAACTGAAATCTATCAGGCCGGTAGCACACCTTGTAAATGGTGTGAAGTTTTAA  
TTGTTACTTTTCTTTACAATCATATGGTTTTCCAACCCACTAATGGTGTGGTTACCAACCATAACAGAGTAGTA  
GTACTTTCTTTTGAACTTCTACATGCACCAGCAACTGTTTGTGGACCTAAAAAGTCTACTAATTTGGTTAAAA  
ACAAATGTGTCAATTTCAACTTCAATGGTTTTAACAGGCACAGGTGTTCTTACTGAGTCTAACAAAAAGTTTCT  
GCCTTTCCAACAATTCGGCAGAGACATTGCTGACACTACTGATGCTGTCCGTGATCCACAGACACTTGAGATT  
CTTGACATTACACCATGTTCTTTTGGTGGTGTGAGTGTATAACACCAGGAACAAATACTTCTAACCAGGTTG  
CTGTTCTTTATCAGGATGTTAACTGCACAGAAGTCCCTGTTGCTATTCATGCAGATCAACTTACTCCTACTTG  
GCGTGTATTATTCTACAGGTTCTAATGTTTTTCAAACACGTGCAGGCTGTTTAATAGGGGCTGAACATGTCAAC  
AACTCATATGAGTGTGACATACCCATTGGTGCAGGTATATGCGCTAGTTATCAGACTCAGACTAATTCTCCTC  
GGCGGGCACGTAGTGTAGCTAGTCAATCCATCATTGCCTACACTATGTCACCTGGTGCAGAAAATTCAGTTGC  
TTACTCTAATAACTCTATTGCCATACCCACAAATTTTACTATTAGTGTACCACAGAAAATTCACCAGTGTCT  
ATGACCAAGACATCAGTAGATTGTACAATGTACATTTGTGGTGAATCAACTGAATGCAGCAATCTTTTGTTC  
AATATGGCAGTTTTTGTACACAATTAACCGTGCCTTAACTGGAATAGCTGTTGAACAAGACAAAAACACCCA  
AGAAGTTTTTGCACAAGTCAAACAATTTACAAAACACCACCAATTAAGATTTTTGGTGGTTTTAATTTTTCA  
CAAATATTACCAGATCCATCAAACCAAGCAAGAGGTCAATTTATTGAAGATCTACTTTTCAACAAAGTGACAC  
TTGCAGATGCTGGCTTCATCAAACAATATGGTGAATTGCCTTGGTGAATTTGCTGCTAGAGACCTCATTTGTGC  
ACAAAAGTTTAAACGGCCTTACTGTTTTGCCACCTTTGCTCACAGA

>R1\_3

ATGTTTGTTTTTCTTGTTTTATTGCCACTAGTCTCTAGTCAGTGTGTTAATCTTACAACCAGAACTCAATTAC  
CCCCTGCATACACTAATTCCTTTCACACGTGGTGTATTATTACCCTGACAAAGTTTTTCAGATCCTCAGTTTTACA  
TTCAACTCAGGACTTGTTCCTTACCTTTCTTTTCCAATGTTACTTGGTTCCATGCTATAACATGTCTCTGGGACC  
AATGGTACTAAGAGGTTTGATAACCCTGTCTTACCATTTAATGATGGTGTATTATTTTGTCTCCACTGAGAAGT  
CTAACATAATAAGAGGCTGGATTTTTGGTACTACTTTAGATTGCAAGACCCAGTCCCTACTTATTGTTAATAA  
CGTACTAATGTTGTTATTAAGTCTGTGAATTTCAATTTTGTAAATGATCCATTTTTGGGTGTTTATTACCAC  
AAAAACAACAAAAGTTGGATGGAAAGTGAGTTCAGAGTTTTATTCTAGTGCGAATAATTGCATTTTTGAATATG  
TCTCTCAGCCTTTTCTTATGGACCTTGAAGGAAAAACAGGGTAATTTCAAAAATCTTAGGGAATTTGTGTTAA  
GAATATTGATGGTTATTTTTAAAATATATTCTAAGCACACGCCTATTAATTTAGTGCCTGATCTCCCTCAGGGT  
TTTTCGGCTTTAGAACCATTTGGTAGATTTGCCAATAGGTATTAACATCACTAGGTTTTCAAACCTTTACTTGCTT  
TACATAGAAGTTATTTGACTCCTGGTGAATCTTCTTTCAGGTTGGACAGCTGGTGTGCAGCTTATTATGTGGG  
TTATCTTCAACCTAGGACTTTTCTATTAAAATATAATGAAAATGGAACCATACAGATGCTGTAGACTGTGCA  
CTTGACCCTCTCTCAGAAAACAAGTGTACGTTGAAATCCTTCACTGTAGAAAAAGGAATCTATCAAACCTTCTA  
ACTTTAGAGTCCAACCAACAGAATCTATTGTTAGATTTCCATAATATTACAACTTGTGCCCTTTTGGTGAAGT  
TTTTAACGCCACCAGATTTGCATCTGTTTATGCTTGGAACAGGAAGAGAATCAGCAACTGTGTTGCTGATTAT  
TCTGTCCTATATAATTCCGCATCATTTTCCACTTTTAAGTGTATGGAGTGTCTCCTACTAAATTAATGATC  
TCTGCTTTACTAATGTCTATGCAGATTCATTTGTAATTAGAGGTGATGAAGTCAGACAAATCGCTCCAGGGCA  
AACTGGAAAGATTGCTGATTATAATTATAAATTACCAGATGATTTTACAGGCTGCGTTATAGCTTGGAAATTCT  
ACAATCTTGATTCTAAGGTTGGTGGTAATTATAATTACCGGTATAGATTGTTTAGGAAGTCTAATCTCAAAC  
CTTTTGAGAGAGATATTTCAACTGAAATCTATCAGGCCGGTAGCACACCTTGTAAATGGTGTGAAGTTTTAA  
TTGTTACTTTTCTTTACAATCATATGGTTTTCCAACCCACTAATGGTGTGGTTACCAACCATAACAGAGTAGTA  
GTACTTTCTTTTGAACTTCTACATGCACCAGCAACTGTTTGTGGACCTAAAAAGTCTACTAATTTGGTTAAAA  
ACAAATGTGTCAATTTCAACTTCAATGGTTTTAACAGGCACAGGTGTTCTTACTGAGTCTAACAAAAAGTTTCT  
GCCTTTCCAACAATTTGGCAGAGACATTGCTGACACTACTGATGCTGTCCGTGATCCACAGACACTTGAGATT  
CTTGACATTACACCATGTTCTTTTGGTGGTGTGAGTGTATAACACCAGGAACAAATACTTCTAACCAGGTTG  
CTGTTCTTTATCAGGATGTTAACTGCACAGAAGTCCCTGTTGCTATTCATGCAGATCAACTTACTCCTACTTG  
GCGTGTATTATTCTACAGGTTCTAATGTTTTTCAAACACGTGCAGGCTGTTTAATAGGGGCTGAACATGTCAAC  
AACTCATATGAGTGTGACATACCCATTGGTGCAGGTATATGCGCTAGTTATCAGACTCAGACTAATTCTCCTC  
GGCGGGCACGTAGTGTAGCTAGTCAATCCATCATTGCCTACACTATGTCACCTGGTGCAGAAAATTCAGTTGC  
TTACTCTAATAACTCTATTGCCATACCCACAAATTTTACTATTAGTGTACCACAGAAAATTCACCAGTGTCT  
ATGACCAAGACATCAGTAGATTGTACAATGTACATTTGTGGTGAATCAACTGAATGCAGCAATCTTTTGTTC  
AATATGGCAGTTTTTGTACACAATTAACCGTGCCTTAACTGGAATAGCTGTTGAACAAGACAAAAACACCCA

AGAAGTTTTTGCACAAGTCAAACAAATTTACAAAACACCACCAATTAAGATTTTTGGTGGTTTTAATTTTTCA  
CAAATATTACCAGATCCATCAAACCAAGCAAGAGGTCAATTTATTGAAGATCTACTTTTCAACAAAGTGACAC  
TTGCAGATGCTGGCTTCATCAAACAATATGGTGATTGCCTTGGTGATATTGCTGCTAGAGACCTCATTTGTGC  
ACAAAAGTTTAAACGGCCTTACTGTTTTGCCACCTTTGCTCACAGA

>R1\_4

ATGTTTGTTTTTCTTGTTTTATTGCCACTAGTCTCTAGTCAGTGTGTTAATCTTACAACCAGAACTCAATTAC  
CCCCTGCATACACTAATTTCTTTCACACGTGGTGTATTATTACCCTGACAAAGTTTTTCAGATCCTCAGTTTTACA  
TTCAACTCAGGACTTGTTCTTACCTTTCTTTTCCAATGTTACTTGGTTCCATGCTATAACATGTCTCTGGGACC  
AATGGTACTAAGAGGTTTGATAACCCTGTCCTACCATTTAATGATGGTGTATTATTTGCTTCCACTGAGAAGT  
CTAACATAATAAGAGGCTGGATTTTTGGTACTACTTTAGATTTCGAAGACCCAGTCCCTACTTATTGTTAATAA  
CGCTACTAATGTTGTTATTAAAGTCTGTGAATTTCAATTTTGTAAATGATCCATTTTTGGGTGTTTTATTACCAC  
AAAACAACAAAAGTTGGATGGAAAGTGAGTTCAGAGTTTATTCTAGTGCGAATAATTGCACCTTTTGAATATG  
TCTCTCAGCCTTTTCTTATGGACCTTGAAGGAAAACAGGGTAATTTCAAAAATCTTAGGGAATTTGTGTTTAA  
GAATATTGATGGTTATTTTAAAATATATTCTAAGCACACGCCTATTAATTTAGTGCGTGATCTCCCTCAGGGT  
TTTTCGGCTTTTAGAACCATTGGTAGATTTGCCAATAGGTATTAACATCACTAGGTTTTCAAACCTTTACTTGCTT  
TACATAGAAGTTATTTGACTCCTGGTGATTCTTCTTCAGGTTGGACAGCTGGTGCTGCAGCTTATTATGTGGG  
TTATCTTCAACCTAGGACTTTTCTATTAAAATATAATGAAAATGGAACCATTACAGATGCTGTAGACTGTGCA  
CTTGACCCTCTCTCAGAAACAAAGTGACGTTGAAATCCTTCACTGTAGAAAAAGGAATCTATCAAACCTTCTA  
ACTTTAGAGTCCAACCAACAGAATCTATTGTTAGATTTCTTAATATTACAACTTGTGCCCTTTTGGTGAAGT  
TTTTAACGCCACCAGATTTGCATCTGTTTATGCTTGGAACAGGAAGAGAATCAGCAACTGTGTTGCTGATTAT  
TCTGTCTATATAATTCGCATCATTTTTCCACTTTTAAAGTGTATGGAGTGTCTCCTACTAAATTAATGATC  
TCTGCTTTACTAATGTCTATGCAGATTCATTTGTAATTAGAGGTGATGAAGTCAGACAAATCGCTCCAGGGCA  
AACTGGAAAGATTGCTGATTATAATTATAAATTACCAGATGATTTTACAGGCTGCCTTATAGCTTGGAAATCT  
ACAATCTTGATTCTAAGGTTGGTGGTAATTATAATTACCGGTATAGATTGTTTAGGAAGTCTAATCTCAAAC  
CTTTTGAGAGAGATATTTCAACTGAAATCTATCAGGCCGGTAGCACACCTTGTAAATGGTGTGGAAGTTTTAA  
TTGTTACTTTTCTTTACAATCATATGGTTTTCAACCCACTAATGGTGTGGTTACCAACCATAACAGAGTAGTA  
GTACTTTCTTTTGAACCTTCTACATGCACCAGCAACTGTTTGTGGACCTAAAAAGTCTACCAATTTGGTTAAAA  
ACAAATGTGTCAATTTCAACTTCAATGGTTTTAACAGGCACAGGTGTTCTTACTGAGTCTAACAAAAAGTTTCT  
GCCTTTCCAACAATTTGGCAGAGACATTGCTGACACTACTGATGCTGTCCGTGATCCACAGACACTTGAGATT  
CTTGACATTACACCATGTTCTTTTGGTGGTGTGAGTGTATAACACCAGGAACAAATACTTCTAACCAGGTTG  
CTGTTCTTTATCAGGATGTTAACTGCACAGAAGTCCCTGTTGCTATTTCATGCAGATCAACTTACTCCTACTTG  
GCGTGTATTATTCTACAGGTTCTAATGTTTTTCAAACACGTGCAGGCTGTTTAAATAGGGGCTGAACATGTCAAC  
AACTCATATGAGTGTGACATACCCATTGGTGCAGGTATATGCGTAGTTATCAGACTCAGACTAATTTCTCCTC  
GGCGGGCACGTAGTGTAGCTAGTCAATCCATCATTGCCACACTATGTCACTTGGTGCAGAAAATTCAGTTGC  
TTACTCTAATAACTCTATTGCCATACCCACAAATTTTACTATTAGTGTACCACAGAAAATTCACCAGTGTCT  
ATGACCAAGACATCAGTAGATTGTACAATGTACATTTGTGGTGATTCAACTGAATGCAGCAATCTTTTGTGTC  
AATATGGCAGTTTTTGTACACAATTAACCGTGCTTTAACTGGAATAGCTGTTGAACAAGACAAAAACACCCA  
AGAAGTTTTTGCACAAGTCAAACAAATTTACAAAACACCACCAATTAAGATTTTTGGTGGTTTTAATTTTTTCA  
CAAATATTACCAGATCCATCAAACCAAGCAAGAGGTCAATTTATTGAAGATCTACTTTTCAACAAAGTGACAC  
TTGCAGATGCTGGCTTCATCAAACAATATGGTGATTGCCTTGGTGATATTGCTGCTAGAGACCTCATTTGTGC  
ACAAAAGTTTAAACGGCCTTACTGTTTTGCCACCTTTGCTCACAGA

>R1\_5

ATGTTTGTTTTTCTTGTTTTATTGCCACTAGTCTCTAGTCAGTGTGTTAATCTTACAACCAGAACTCAATTAC  
CCCCTGCATACACTAATTTCTTTCACACGTGGTGTATTATTACCCTGACAAAGTTTTTCAGATCCTCAGTTTTACA  
TTCAACTCAGGACTTGTTCTTACCTTTCTTTTCCAATGTTACTTGGTTCCATGCTATAACATGTCTCTGGGACC  
AATGGTACTAAGAGGTTTGATAACCCTGTCCTACCATTTAATGATGGTGTATTATTTGCTTCCACTGAGAAGT  
CTAACATAATAAGAGGCTGGATTTTTGGTACTACTTTAGATTTCGAAGACCCAGTCCCTACTTATTGTTAATAA  
CGCTACTAATGTTGTTATTAAAGTCTGTGAATTTCAATTTTGTAAATGATCCATTTTTGGGTGTTTTATTACCAC  
AAAACAACAAAAGTTGGATGGAAAGTGAGTTCAGAGTTTATTCTAGTGCGAATAATTGCACCTTTTGAATATG  
TCTCTCAGCCTTTTCTTATGGACCTTGAAGGAAAACAGGGTAATTTCAAAAATCTTAGGGAATTTGTGTTTAA  
GAATATTGATGGTTATTTTAAAATATATTCTAAGCACACGCCTATTAATTTAGTGCGTGATCTCCCTCAGGGT  
TTTTCGGCTTTTAGAACCATTGGTAGATTTGCCAATAGGTATTAACATCACTAGGTTTTCAAACCTTTACTTGCTT  
TACATAGAAGTTATTTGACTCCTGGTGATTCTTCTTCAGGTTGGACAGCTGGTGCTGCAGCTTATTATGTGGG  
TTATCTTCAACCTAGGACTTTTCTATTAAAATATAATGAAAATGGAACCATTACAGATGCTGTAGACTGTGCA

CTTGACCCTCTCTCAGAAACAAAGTGTACGTTGAAATCCTTCACTGTAGAAAAAGGAATCTATCAAACCTTCTA  
ACTTTAGAGTCCAACCAACAGAATCTATTGTTAGATTTCCCTAATATTACAAACTTGTGCCCTTTTGGTGAAGT  
TTTTAACGCCACCAGATTTGCATCTGTTTATGCTTGGAACAGGAAGAGAATCAGCAACTGTGTTGCTGATTAT  
TCTGTCCTATATAAATCCGCATCATTTTCCACTTTTAAAGTGTATGGAGTGTCTCCTACTAAATTAATGATC  
TCTGCTTTACTAATGTCTATGCAGATTCATTTGTAATTAGAGGTGATGAAGTCAGACAAATCGCTCCAGGGCA  
AACTGGAAAGATTGCTGATTATAAATTATAAATTACCAGATGATTTTACAGGCTGCGTTATAGCTTGGAAATCT  
ACAATCTTGATTCTAAGGTTGGTGGTAATTATAATTACCTGTATAGATTGTTTAGGAAGTCTAATCTCAAAC  
CTTTTGAGAGAGATATTTCAACTGAAATCTATCAGGCCGGTAGCACACCTTGTAAATGTTGTTGAAGGTTTTAA  
TTGTTACTTTTCTTTACAATCATATGGTTTTCCAACCCACTAATGGTGTGGTTACCAACCATAACAGAGTAGTA  
GTACTTTCTTTTGAACTTCTACATGCACCAGCAACTGTTTGTGGACCTAAAAAGTCTACTAATTTGGTTAAAA  
ACAAATGTGTCAATTTCAACTTCAATGGTTTAAACAGGCACAGGTGTTCTTACTGAGTCTAACAAAAAGTTTCT  
GCCTTTCCAACAATTTGGCAGAGACATTGCTGACACTACTGATGCTGTCCGTGATCCACAGACACTTGAGATT  
CTTGACATTACACCATGTTCTTTTGGTGGTGTGAGTGTATAACACCAGGAACAAATACTTCTAACCAGGTTG  
CTGTTCTTTATCAGGATGTTAACTGCACAGAAGTCCCTGTTGCTATTCATGCAGATCAACTTACTCCTACTTG  
GCGTGTATTATTCTACAGGTTCTAATGTTTTTCAAACACGTGCAGGCTGTTTAATAGGGGCTGAACATGTCAAC  
AACTCATATGAGTGTGACATACCCATTGGTGCAGGTATATGCGCTAGTTATCAGACTCAGACTAATTCTCCTC  
GGCGGGCACGTAGTGTAGCTAGTCAATCCATCATTGCCCTACACTATGTCACTTGGTGCAGAAAATTCAGTTGC  
TTACTCTAATAACTCTATTGCCATACCCACAAATTTTACTATTAGTGTACCACAGAAAATTCACCAGTGTCT  
ATGACCAAGACATCAGTAGATTGTACAATGTACATTTGTGGTGAATCAACTGAATGCAGCAATCTTTTGTTC  
AATATGGCAGTTTTTGTACACAATTAACCGTGTCTTAACTGGAATAGCTGTTGAACAAGACAAAAACACCCA  
AGAAGTTTTTGCACAAGTCAAACAATTTACAAAACACCACCAATTAAGATTTTTGGTGGTTTTAATTTTTTCA  
CAAATATTACCAGATCCATCAAACCAAGCAAGAGGTCAATTTATTGAAGATCTACTTTTCAACAAAGTGACAC  
TTGCAGATGCTGGCTTCATCAAACAATATGGTGAATTGCCTTGGTGAATTTGCTGCTAGAGACCTCATTTGTGC  
ACAAAAGTTTAAACGGCCTTACTGTTTTGCCACCTTTGCTCACAGA

>R1\_6

ATGTTTGTTTTTCTTGTTTTTATTGCCACTAGTCTCTAGTCAGTGTGTTAATCTTACAACCAGAACTCAATTAC  
CCCCTGCATACACTAATTTCTTTCACACGTGGTGTTTATTACCCTGACAAAGTTTTTCAGATCCTCAGTTTTACA  
TTCAACTCAGGACTTGTCTTACCTTTCTTTTCCAATGTTACTTGGTTCCATGCTATACATGTCTCTGGGACC  
AATGGTACTAAGAGGTTTGATAACCCTGTCTTACCATTTAATGATGGTGTTTATTTTTGCTTCCACTGAGAAGT  
CTAACATAATAAGAGGCTGGATTTTTGGTACTACTTTAGATTGGAAGACCCAGTCCCTACTTATTGTTAATAA  
CGTACTAATGTTGTTATTTAAAGTCTGTGAATTTCAATTTTGTAAATGATCCATTTTTGGGTGTTTATTACCAC  
AAAAACAACAAAAGTTGGATGGAAAGTGAGTTCAGAGTTTATTCTAGTGCGAATAATTGCATTTTTGAATATG  
TCTCTCAGCCTTTTCTTATGGACCTTGAAGGAAAACAGGGTAATTTCAAAAATCTTAGGGAATTTGTGTTTAA  
GAATATTGATGGTTATTTTTAAAATATATTCTAAGCACACGCCTATTAATTTAGTGCCTGATCTCCCTCAGGGT  
TTTTCGGCTTTAGAACCATTTGGTAGATTTGCCAATAGGTATTAACATCACTAGGTTTCAAACCTTTACTTGCTT  
TACATAGAAGTTATTTGACTCCTGGTGAATCTTCTTTCAGGTTGGACAGCTGGTGTGCAGCTTATTATGTGGG  
TTATCTTCAACCTAGGACTTTTCTATTAAAATATAATGAAAATGGAACCATACAGATGCTGTAGACTGTGCA  
CTTGACCCTCTCTCAGAAACAAAGTGTACGTTGAAATCCTTCACTGTAGAAAAAGGAATCTATCAAACCTTCTA  
ACTTTAGAGTCCAACCAACAGAATCTATTGTTAGATTTCCCTAATATTACAAACTTGTGCCCTTTTGGTGAAGT  
TTTTAACGCCACCAGATTTGCATCTGTTTATGCTTGGAACAGGAAGAGAATCAGCAACTGTGTTGCTGATTAT  
TCTGTCCTATATAAATCCGCATCATTTTCCACTTTTAAAGTGTATGGAGTGTCTCCTACTAAATTAATGATC  
TCTGCTTTACTAATGTCTATGCAGATTCATTTGTAATTAGAGGTGATGAAGTCAGACAAATCGCTCCAGGGCA  
AACTGGAAAGATTGCTGATTATAAATTATAAATTACCAGATGATTTTACAGGCTGCGTTATAGCTTGGAAATCT  
ACAATCTTGATTCTAAGGTTGGTGGTAATTATAATTACCTGTATAGATTGTTTAGGAAGTCTAATCTCAAAC  
CTTTTGAGAGAGATATTTCAACTGAAATCTATCAGGCCGGTAGCACACCTTGTAAATGGTGTAAAGGTTTTAA  
TTGTTACTTTTCTTTACAATCATATGGTTTTCCAACCCACTAATGGTGTGGTTACCAACCATAACAGAGTAGTA  
GTACTTTCTTTTGAACTTCTACATGCACCAGCAACTGTTTGTGGACCTAAAAAGTCTACTAATTTGGTTAAAA  
ACAAATGTGTCAATTTCAACTTCAATGGTTTAAACAGGCACAGGTGTTCTTACTGAGTCTAACAAAAAGTTTCT  
GCCTTTCCAACAATTTGGCAGAGACATTGCTGACACTACTGATGCTGTCCGTGATCCACAGACACTTGAGATT  
CTTGACATTACACCATGTTCTTTTGGTGGTGTGAGTGTATAACACCAGGAACAAATACTTCTAACCAGGTTG  
CTGTTCTTTATCAGGATGTTAACTGCACAGAAGTCCCTGTTGCTATTCATGCAGATCAACTTACTCCTACTTG  
GCGTGTATTATTCTACAGGTTCTAATGTTTTTCAAACACGTGCAGGCTGTTTAATAGGGGCTGAACATGTCAAC  
AACTCATATGAGTGTGACATACCCATTGGTGCAGGTATATGCGCTAGTTATCAGACTCAGACTAATTCTCCTC  
GGCGGGCACGTAGTGTAGCTAGTCAATCCATCATTGCCCTACACTATGTCACTTGGTGCAGAAAATTCAGTTGC

TTACTCTAATAACTCTATTGCCATACCCACAAATTTTACTATTAGTGTTACCCACAGAAATTTCTACCAGTGTCT  
ATGACCAAGACATCAGTAGATTGTACAATGTACATTTGTGGTGATTCAACTGAATGCAGCAATCTTTTGGTTGC  
AATATGGCAGTTTTTGTACACAATTAACCGTGCTTTAACTGGAATAGCTGTTGAACAAGACAAAAACACCCA  
AGAAGTTTTTGCACAAGTCAAACAAATTTACAAAACACCACCAATTAAGATTTTTGGTGGTTTTAATTTTTCA  
CAAATATTACCAGATCCATCAAACCAAGCAAGAGGTCAATTTATTGAAGATCTACTTTTCAACAAAGTGACAC  
TTGCAGATGCTGGCTTCATCAAACAATATGGTGATTGCCTTGGTGATATTGCTGCTAGAGACCTCATTTGTGC  
ACAAAAGTTTAAACGGCCTTACTGTTTTGCCACCTTTGCTCACAGA

>R1\_7

ATGTTTGTTTTTCTTGTTTTATTGCCACTAGTCTCTAGTCAGTGTGTTAATCTTACAACCAGAACTCAATTAC  
CCCCTGCATACACTAATTTCTTTCACACGTGGTGTATTATTACCCTGACAAAGTTTTTCAGATCCTCAGTTTTACA  
TTCAACTCAGGACTTGTTCTTACCTTTCTTTTCCAATGTTACTTGGTTCCATGCTATACATGTCTCTGGGACC  
AATGGTACTAAGAGGTTTGATAACCCTGTCTACCATTTAATGATGGTGTATTATTTGCTTCCACTGAGAAGT  
CTAACATAATAAGAGGCTGGATTTTTGGTACTACTTTAGATTCTGAAGACCCAGTCCCTACTTATTGTTAATAA  
CGCTACTAATGTTGTTATTAAAGTCTGTGAATTTCAATTTTGTAAATGATCCATTTTTGGGTGTTTTATTACCAC  
AAAAACAACAAAAGTTGGATGGAAAGTGAGTTCAGAGTTTATTCTAGTGCGAATAATTGCACCTTTTGAATATG  
TCTCTCAGCCTTTTCTTATGGACCTTGAAGGAAAACAGGGTAATTTCAAAAATCTTAGGGAATTTGTGTTTTAA  
GAATATTGATGGTTATTTTTAAAATATATTCTAAGCACACGCCTATTAATTTAGTGCGTGATCTCCCTCAGGGT  
TTTTCGGCTTTTAGAACCATTGGTAGATTTGCCAATAGGTATTAACATCACTAGGTTTCAAACCTTTACTTGCTT  
TACATAGAAGTTATTTGACTCCTGGTGATTCTTCTTCAGTGGGACAGCTGGTGCTGCAGCTTATTATGTGGG  
TTATCTTCAACCTAGGACTTTTCTATTAATAATAATGAAAATGGAACCATACAGATGCTGTAGACTGTGCA  
CTTGACCCTCTCTCAGAAACAAAGTGTACGTTGAAATCCTTCACTGTAGAAAAGGAATCTATCAAACCTTCTA  
ACTTTAGAGTCCAACCAACAGAATCTATTGTTAGATTTCTTAATATTACAAACTTGTGCCCTTTTGGTGAAGT  
TTTTAACGCCACCAGATTTGCATCTGTTTTATGCTTGGAACAGGAAGAGAATCAGCAACTGTGTTGCTGATTAT  
TCTGTCTATATAAATCCGCATCATTTTTCCACTTTTAAAGTGTATGGAGTGTCTCCTACTAAATTAATGATC  
TCTGCTTTACTAATGTCTATGCAGATTCATTTGTAATTAGAGGTGATGAAGTCAGACAAATCGCTCCAGGGCA  
AACTGGAAAGATTGCTGATTATAATTATAAATTACCAGATGATTTTACAGGCTGCGTTATAGCTTGGAAATCT  
ACAATCTTGATTCTAAGGTTGGTGGTAATTATAATTACCTGTATAGATTGTTTAGGAAGTCTAATCTCAAAT  
CTTTTGAGAGAGATATTTCAACTGAAATCTATCAGGCCGGTAGCACACCTTGTAAATGGTGTGGAAGTTTTAA  
TTGTTACTTTTCTTTTACAATCATATGGTTTTCCAACCCACTAACGGTGTGGTTACCAACCATAACAGAGTAGTA  
GTACTTTCTTTTGAACCTTCTACATGCACCAGCAACTGTTTGTGGACCTAAAAAGTCTACTAATTTGGTTAAAA  
ACAAATGTGTCAATTTCAACTTCAATGGTTTTAACAGGCACAGGTGTTCTTACTGAGTCTAACAAAAGTTTTCT  
GCCTTTCCAACAATTTGGCAGAGACATTGCTGACACTACTGATGCTGTCCGTGATCCACAGACACTTGAGATT  
CTTGACATTACACCATGTTCTTTTGGTGGTGTGAGTGTATAACACCAGGAACAAATACTTCTAACCAGGTTG  
CTGTTCTTTATCAGGATGTTAACTGCACAGAAGTCCCTGTTGCTATTTCATGCAGATCAACTTACTCCTACTTG  
GCGTGTATTATTCTACAGGTTCTAATGTTTTTCAAACACGTGCAGGCTGTTTAATAGGGGCTGAACATGTCAAC  
AACTCATATGAGTGTGACATACCCATTGGTGCAGGTATATGCGCTAGTTATCAGACTCAGACTAATTTCTCCTC  
GGCGGGCACGTAGTGTAGCTAGTCAATCCATCATTGCCTACACTATGTCACTTGGTGCAGAAAATTCAGTTGC  
TTACTCTAATAACTCTATTGCCATACCCACAAATTTTACTATTAGTGTTACCCACAGAAATTTCTACCAGTGTCT  
ATGACCAAGACATCAGTAGATTGTACAATGTACATTTGTGGTGATTCAACTGAATGCAGCAATCTTTTGGTTGC  
AATATGGCAGTTTTTGTACACAATTAACCGTGCTTTAACTGGAATAGCTGTTGAACAAGACAAAAACACCCA  
AGAAGTTTTTGCACAAGTCAAACAAATTTACAAAACACCACCAATTAAGATTTTTGGTGGTTTTAATTTTTCA  
CAAATATTACCAGATCCATCAAACCAAGCAAGAGGTCAATTTATTGAAGATCTACTTTTCAACAAAGTGACAC  
TTGCAGATGCTGGCTTCATCAAACAATATGGTGATTGCCTTGGTGATATTGCTGCTAGAGACCTCATTTGTGC  
ACAAAAGTTTAAACGGCCTTACTGTTTTGCCACCTTTGCTCACAGA

>R1\_8

ATGTTTGTTTTTCTTGTTTTATTGCCACTAGTCTCTAGTCAGTGTGTTAATCTTACAACCAGAACTCAATTAC  
CCCCTGCATACACTAATTTCTTTCACACGTGGTGTATTATTACCCTGACAAAGTTTTTCAGATCCTCAGTTTTACA  
TTCAACTCAGGACTTGTTCTTACCTTTCTTTTCCAATGTTACTTGGTTCCATGCTATACATGTCTCTGGGACC  
AATGGTACTAAGAGGTTTGATAACCCTGTCTACCATTTAATGATGGTGTATTATTTGCTTCCACTGAGAAGT  
CTAACATAATAAGAGGCTGGATTTTTGGTACTACTTTAGATTCTGAAGACCCAGTCCCTACTTATTGTTAATAA  
CGCTACTAATGTTGTTATTAAAGTCTGTGAATTTCAATTTTGTAAATGATCCATTTTTGGGTGTTTTATTACCAC  
AAAAACAACAAAAGTTGGATGGAAAGTGAGTTCAGAGTTTATTCTAGTGCGAATAATTGCACCTTTTGAATATG  
TCTCTCAGCCTTTTCTTATGGACCTTGAAGGAAAACAGGGTAATTTCAAAAATCTTAGGGAATTTGTGTTTTAA  
GAATATTGATGGTTATTTTTAAAATATATTCTAAGCACACGCCTATTAATTTAGTGCGTGATCTCCCTCAGGGT

TTTTCGGCTTTAGAACCATTTGGTAGATTTGCCAATAGGTATTAACATCACTAGGTTTCAAACCTTTACTTGCTT  
TACATAGAAGTTATTTGACTCCTGGTGATTCTTCTTCAGGTTGGACAGCTGGTGCTGCAGCTTATTATGTGGG  
TTATCTTCAACCTAGGACTTTTCTATTAAAATATAATGAAAATGGAACCATTACAGATGCTGTAGACTGTGCA  
CTTGACCCTCTCTCAGAAACAAAGTGTACGTTGAAATCCTTCAGTGTAGAAAAAGGAATCTATCAAACCTTCTA  
ACTTTAGAGTCCAACCAACAGAATCTATTGTTAGATTTCCCTAATATTACAAACTTGTGCCCTTTTGGTGAAGT  
TTTTAACGCCACCAGATTTGCATCTGTTTATGCTTGGAACAGGAAGAGAATCAGCAACTGTGTTGCTGATTAT  
TCTGTCCTATATAAATCCGCATCATTTTCCACTTTTAAAGTGTATGGAGTGTCTCCTACTAAATTAATGATC  
TCTGCTTTACTAATGTCTATGCAGATTCATTTGTAATTAGAGGTGATGAAGTCAGACAAATCGCTCCAGGGCA  
AACTGGAAAGATTGCTGATTATAATTATAAATTACCAGATGATTTTACAGGCTGCGTTATAGCTTGGAAATCT  
ACAATCTTGATTCTAAGGTTGGTGGTAATTATAATTACCTGTATAGATTGTTTAGGAAGTCTAATCTCAAAC  
CTTTTGAGAGAGATATTTCAACTGAAATCTATCAGGCCGGTAGCACACCTTGTAAATGGTGTGAAGTTTTAA  
TTGTTACTTTTCTTTACAATCATATGGTTTTCCAACCCACTAATGGGGTTGGTTACCAACCATAACAGAGTAGTA  
GTACTTTCTTTTGAACTTCTACATGCACCAGCAACTGTTTGTGGACCTAAAAAGTCTACTAATTTGGTTAAAA  
ACAAATGTGTCAATTTCAACTTCAATGGTTTTAACAGGCACAGGTGTTCTTACTGAGTCTAACAAAAAGTTTCT  
GCCTTTCCAACAATTTGGCAGAGACATTGCTGACACTACTGATGCTGTCCGTGATCCACAGACACTTGAGATT  
CTTGACATTACACCATGTTCTTTTGGTGGTGTGAGTGTATAACACCAGGAACAAATACTTCTAACCAGGTTG  
CTGTTCTTTATCAGGATGTTAACTGCACAGAAGTCCCTGTTGCTATTTCATGCAGATCAACTTACTCCTACTTG  
GCGTGTATTATTCTACAGTTCTAATGTTTTTCAAACACGTGCAGGCTGTTTAAATAGGGGCTGAACATGTCAAC  
AACTCATATGAGTGTGACATACCCATTGGTGCAGGTATATGCGCTAGTTATCAGACTCAGACTAATTTCTCCTC  
GGCGGGCACGTAGTGTAGCTAGTCAATCCATCATTGCCCTACACTATGTCACCTGGTGCAGAAAATTCAGTTGC  
TTACTCTAATAACTCTATTGCCATACCCACAAATTTTACTATTAGTGTACCACAGAAAATCTACCAGTGTCT  
ATGACCAAGACATCAGTAGATTGTACAATGTACATTTGTGGTGAATCAACTGAATGCAGCAATCTTTTGTGTC  
AATATGGCAGTTTTTGTACACAATTAACCGTGTCTTAACTGGAATAGCTGTTGAACAAGACAAAAACACCCA  
AGAAGTTTTTGCACAAGTCAAACAAATTTACAAAACACCACCAATTAAGATTTTTGGTGGTTTTAATTTTTTCA  
CAAATATTACCAGATCCATCAAACCAAGCAAGAGGTCAATTTATTGAAGATCTACTTTTCAACAAAGTGACAC  
TTGCAGATGCTGGCTTCATCAAACAATATGGTGATTGCCTTGGTGATATTGCTGCTAGAGACCTCATTTGTGC  
ACAAAAGTTTTAACGGCTTACTGTTTTGCCACCTTTGCTCACAGA

>R1\_9

ATGTTTGTTTTTCTTGTTTTATTGCCACTAGTCTCTAGTCAGTGTGTTAATCTTACAACCAGAACTCAATTAC  
CCCCTGCATACACTAATTTCTTTCACACGTGGTGTATTACCCTGACAAAGTTTTTCAGATCCTCAGTTTTTACA  
TTCAACTCAGGACTTGTTCCTTACCTTTCTTTTCCAATGTTACTTGGTTCCATGCTATAACATGTCTCTGGGACC  
AATGGTACTAAGAGGTTTGATAACCCTGTCTTACCATTTAATGATGGTGTATTATTTTGTCTCCACTGAGAAGT  
CTAACATAATAAGAGGCTGGATTTTTGGTACTACTTTAGATTGCAAGACCCAGTCCCTACTTATTGTTAATAA  
CGTACTAATGTTGTTATTAAAGTCTGTGAATTTCAATTTTGTAAATGATCCATTTTTGGGTGTTTATTACCAC  
AAAAACAACAAAAGTTGGATGGAAAGTGAGTTTCAAGATTTATTCTAGTGCGAATAATTGCACCTTTTGAATATG  
TCTCTCAGCCTTTTCTTATGGACCTTGAAGGAAAACAGGGTAATTTCAAAAATCTTAGGGAATTTGTGTTAA  
GAATATTGATGGTTATTTTTAAAATATATTCTAAGCACACGCCATTAAATTTAGTGCCTGATCTCCCTCAGGGT  
TTTTCGGCTTTAGAACCATTTGGTAGATTTGCCAATAGGTATTAACATCACTAGGTTTCAAACCTTTACTTGCTT  
TACATAGAAGTTATTTGACTCCTGGTGATTCTTCTTCAGGTTGGACAGCTGGTGCTGCAGCTTATTATGTGGG  
TTATCTTCAACCTAGGACTTTTCTATTAAAATATAATGAAAATGGAACCATTACAGATGCTGTAGACTGTGCA  
CTTGACCCTCTCTCAGAAACAAAGTGTACGTTGAAATCCTTCAGTGTAGAAAAAGGAATCTATCAAACCTTCTA  
ACTTTAGAGTCCAACCAACAGAATCTATTGTTAGATTTCCCTAATATTACAAACTTGTGCCCTTTTGGTGAAGT  
TTTTAACGCCACCAGATTTGCATCTGTTTATGCTTGGAACAGGAAGAGAATCAGCAACTGTGTTGCTGATTAT  
TCTGTCCTATATAAATCCGCATCATTTTCCACTTTTAAAGTGTATGGAGTGTCTCCTACTAAATTAATGATC  
TCTGCTTTACTAATGTCTATGCAGATTCATTTGTAATTAGAGGTGATGAAGTCAGACAAATCGCTCCAGGGCA  
AACTGGAAAGATTGCTGATTATAATTATAAATTACCAGATGATTTTACGGGCTGCGTTATAGCTTGGAAATCT  
ACAATCTTGATTCTAAGGTTGGTGGTAATTATAATTACCTGTATAGATTGTTTAGGAAGTCTAATCTCAAAC  
CTTTTGAGAGAGATATTTCAACTGAAATCTATCAGGCCGGTAGCACACCTTGTAAATGGTGTGAAGTTTTAA  
TTGTTACTTTTCTTTACAATCATATGGTTTTCCAACCCACTAATGGTGTGGTTACCAACCATAACAGAGTAGTA  
GTACTTTCTTTTGAACTTCTACATGCACCAGCAACTGTTTGTGGACCTAAAAAGTCTACTAATTTGGTTAAAA  
ACAAATGTGTCAATTTCAACTTCAATGGTTTTAACAGGCACAGGTGTTCTTACTGAGTCTAACAAAAAGTTTCT  
GCCTTTCCAACAATTTGGCAGAGACATTGCTGACACTACTGATGCTGTCCGTGATCCACAGACACTTGAGATT  
CTTGACATTACACCATGTTCTTTTGGTGGTGTGAGTGTATAACACCAGGAACAAATACTTCTAACCAGGTTG  
CTGTTCTTTATCAGGATGTTAACTGCACAGAAGTCCCTGTTGCTATTTCATGCAGATCAACTTACTCCTACTTG

CGGTGTTTATTCTACAGGTTCTAATGTTTTTCAAACACGTGCAGGCTGTTTAATAGGGGCTGAACATGTCAAC  
AACTCATATGAGTGTGACATACCCATTGGTGCAGGTATATGCGCTAGTTATCAGACTCAGACTAATTCTCCTC  
GGCGGGCACGTAGTGTAGCTAGTCAATCCATCATTGCCTACACTATGTCACCTGGTGCAGAAAATTCAGTTGC  
TTACTCTAATAACTCTATTGCCATACCCACAAATTTTACTATTAGTGTACCACAGAAAATCTACCAGTGTCT  
ATGACCAAGACATCAGTAGATTGTACAATGTACATTTGTGGTGATTCAACTGAATGCAGCAATCTTTTGGTTGC  
AATATGGCAGTTTTTGTACACAATTAACCGTGCTTTAACTGGAATAGCTGTTGAACAAGACAAAAACACCCA  
AGAAGTTTTTGCACAAGTCAAACAAATTTACAAAACACCACCAATTAAGATTTTTGGTGGTTTTAATTTTTCA  
CAAATATTACCAGATCCATCAAACCAAGCAAGAGGTCAATTTATTGAAGATCTACTTTTCAACAAAGTGACAC  
TTGCAGATGCTGGCTTCATCAAACAATATGGTGATTGCCTTGGTGATATTGCTGCTAGAGACCTCATTTGTGC  
ACAAAAGTTTAAACGGCCTTACTGTTTTGCCACCTTTGCTCACAGA

>R1\_10

ATGTTTGTTTTTCTTGTTTTATTGCCACTAGTCTCTAGTCAGTGTGTTAATCTTACAACCAGAACTCAATTAC  
CCCCTGCATACACTAATTCTTTTACACGTGGTGTTTATTACCCTGACAAAGTTTTTCAGATCCTCAGTTTTTACA  
TTCAACTCAGGACTTGTCTTACCTTTCTTTTCCAATGTTACTTGGTTCCATGCTATACATGTCTCTGGGACC  
AATGGTACTAAGAGGTTTGATAACCCTGTCCTACCATTTAATGATGGTGTTTATTTTGTCTCCACTGAGAAGT  
CTAACATAATAAGAGGCTGGATTTTTGGTACTACTTTAGATTCTGAAGACCCAGTCCCTACTTATTGTTAATAA  
CGCTACTAATGTTGTTATTAAAGTCTGTGAATTTCAATTTTGTAAATGATCCATTTTTGGGTGTTTATTACCAC  
AAAAACAACAAAAGTTGGATGGAAAGTGAGTTCAGAGTTTATTCTAGTGCGAATAATTGCACTTTTGAATATG  
TCTCTCAGCCTTTTCTTATGGACCTTGAAGGAAAACAGGGTAATTTCAAAAATCTTAGGGAATTTGTGTTTAA  
GAATATTGATGGTTATTTTAAAATATATTCTAAGCACACGCCTATTAATTTAGTGCCTGATCTCCCTCAGGGT  
TTTTCGGCTTTAGAACCATTTGGTAGATTTGCCAATAGGTATTAACATCACTAGGTTTCAAACCTTTACTTGCTT  
TACATAGAAGTTATTTGACTCCTGGTGAATCTTCTTCAGTGGACAGCTGGTGTGCAGCTTATTATGTGGG  
TTATCTTCAACCTAGGACTTTTCTATTAATAATAATGAAAATGGAACCATACAGATGCTGTAGACTGTGCA  
CTTGACCCTCTCTCAGAAAACAAAGTGTACGTTGAAATCCTTCACTGTAGAAAAAGGAATCTATCAAACCTTCTA  
ACTTTAGAGTCCAACCAACAGAATCTATTGTTAGATTTCCATAATTACAAACTTGTGCCCTTTTGGTGAAGT  
TTTTAACGCCACCAGATTTGCATCTGTTTATGCTTGGAACAGGAAGAGAATCAGCAACTGTGTTGCTGATTAT  
TCTGTCTTATAAATCCGCATCATTTTTCCACTTTTAAAGTGTATGGAGTGTCTCCTACTAAATTAATGATC  
TCTGCTTTACTAATGTCTATGCAGATTCATTTGTAATTAGAGGTGATGAAGTCAAGACAAATCGCTCCAGGGCA  
AACTGGAAAGATTGCTGATTATAATTATAAATTACCAGATGATTTTACAGGCTGCGTTATAGCTTGGAAATCT  
ACAATCTTGATTCTAAGGTTGGTGGTAATTATAATTACCTGTATAGATTGTTTAGGAAGTCTAATCTCAAAC  
CTTTTGAGAGAGATATTTCAACTGAAATCTATCAGGCCGGTAGCACACCTTGTAAATGGTGTGGAAGTTTTCAA  
TTGTTACTTTTCTTTTACAATCATATGGTTTTCCAACCCACTAATGGTGTGGTTACCAACCATAACAGAGTAGTA  
GTACTTTCTTTTGAACCTTCTACATGCACCAGCAACTGTTTGTGGACCTAAAAAGTCTACTAATTTGGTTAAAA  
ACAAATGTGTCAATTTCAACTTCAATGGTTTAAACAGGCACAGGTGTTCTTACTGAGTCTAACAAAAGTTTCT  
GCCTTTCCAACAATTTGGCAGAGACATTGCTGACACTACTGATGCTGTCCGTGATCCACAGACACTTGAGATT  
CTTGACATTACACCATGTTCTTTTGGTGGTGTGAGTGTATAACACCAGGAACAAATACTTCTAACCAGGTTG  
CTGTTCTTTATCAGGATGTTAACTGCACAGAAGTCCCTGTTGCTATTTCATGCAGATCAACTTACTCCTACTTG  
GCGTGTTTATTCTACAGGTTCTAATGTTTTTCAAACACGTGCAGGCTGTTTAATAGGGGCTGAACATGTCAAC  
AACTCATATGAGTGTGACATACCCATTGGTGCAGGTATATGCGCTAGTTATCAGACTCAGACTAATTCTCCTC  
GGCGGGCACGTAGTGTAGCTAGTCAATCCATCATTGCCTACACTATGTCACCTGGTGCAGAAAATTCAGTTGC  
TTACTCTAATAACTCTATTGCCATACCCACAAATTTTACTATTAGTGTACCACAGAAAATCTACCAGTGTCT  
ATGACCAAGACATCAGTAGATTGTACAATGTACATTTGTGGTGATTCAACTGAATGCAGCAATCTTTTGGTTGC  
AATATGGCAGTTTTTGTACACAATTAACCGTGCTTTAACTGGAATAGCTGTTGAACAAGACAAAAACACCCA  
AGAAGTTTTTGCACAAGTCAAACAAATTTACAAAACACCACCAATTAAGATTTTTGGTGGTTTTAATTTTTCA  
CAAATATTACCAGATCCATCAAACCAAGCAAGAGGTCAATTTATTGAAGATCTACTTTTCAACAAAGTGACAC  
TTGCAGATGCTGGCTTCATCAAACAATATGGTGATTGCCTTGGTGATATTGCTGCTAGAGACCTCATTTGTGC  
ACAAAAGTTTAAACGGCCTTACTGTTTTGCCACCTTTGCTCACAGA

>R1\_11

ATGTTTGTTTTTCTTGTTTTATTGCCACTAGTCTCTAGTCAGTGTGTTAATCTTACAACCAGAACTCAATTAC  
CCCCTGCATACACTAATTCTTTTACACGTGGTGTTTATTACCCTGACAAAGTTTTTCAGATCCTCAGTTTTTACA  
TTCAACTCAGGACTTGTCTTACCTTTCTTTTCCAATGTTACTTGGTTCCATGCTATACATGTCTCTGGGACC  
AATGGTACTAAGAGGTTTGATAACCCTGTCCTACCATTTAATGATGGTGTTTATTTTGTCTCCACTGAGAAGT  
CTAACATAATAAGAGGCTGGATTTTTGGTACTACTTTAGATTCTGAAGACCCAGTCCCTACTTATTGTTAATAA  
CGCTACTAATGTTGTTATTAAAGTCTGTGAATTTCAATTTTGTAAATGATCCATTTTTGGGTGTTTATTACCAC

AAAAACAACAAAAGTTGGATGGAAAGTGAGTTCAGAGTTTATTCTAGTGCGAATAATTGCACTTTTGAATATG  
TCTCTCAGCCTTTTCTTATGGACCTTGAAGGAAAACAGGGTAATTTCAAAAATCTTAGGGAATTTGTGTTAA  
GAATATTGATGGTTATTTTAAAATATATTCTAAGCACACGCCATTAAATTTAGTGCGTGATCTCCCTCAGGGT  
TTTTCGGCTTTAGAACCATTTGGTAGATTTGCCAATAGGTATTAACATCACTAGGTTTCAAACCTTTACTTGCTT  
TACATAGAAGTTATTTGACTCCTGGTGATTCTTCTTCAGGTTGGACAGCTGGTGCTGCAGCTTATTATGTGGG  
TTATCTTCAACCTAGGACTTTTCTATTAAAATATAATGAAAATGGAACCATTACAGATGCTGTAGACTGTGCA  
CTTGACCCTCTCTCAGAAAACAAAGTGTACGTTGAAATCCTTCAGTGTAGAAAAAGGAATCTATCAAACCTTCTA  
ACTTTAGAGTCCAACCAACAGAATCTATTGTTAGATTTCCCTAATATTACAAACTTGTGCCCTTTTGGTGAAGT  
TTTTAACGCCACCAGATTTGCATCTGTTTATGCTTGGAACAGGAAGAGAATCAGCAACTGTGTTGCTGATTAT  
TCTGTCCTATATAAATCCGCATCATTTTCCACTTTTAAAGTGTATGGAGTGTCTCCTACTAAATTAATGATC  
TCTGCTTTACTAATGTCTATGCAGATTCATTTGTAATTAGAGGTGATGAAGTCAGACAAATCGCTCCAGGGCA  
AACTGGAAAGATTGCTGATTATAATTATAAATTACCAGATGATTTTACAGGCTGCGTTATAGCTTGGAATTCT  
ACAATCTTGACTCTAAGGTTGGTGGTAATTATAATTACCTGTATAGATTGTTTAGGAAGTCTAATCTCAAAC  
CTTTTGAGAGAGATATTTCAACTGAAATCTATCAGGCCGGTAGCACACCTTGTAAATGGTGTGGAAGTTTTAA  
TTGTTACTTTTCTTTACAATCATATGGTTTTCCAACCCACTAATGGTGTGGTTACCAACCATACAGAGTAGTA  
GTACTTTCTTTTGAACTTCTACATGCACCAGCAACTGTTTGTGGACCTAAAAAGTCTACTAATTTGGTTAAAA  
ACAAATGTGTCAATTTCAACTTCAATGGTTTTAACAGGCACAGGTGTTCTTACTGAGTCTAACAAAAAGTTTCT  
GCCTTTCCAACAATTTGGCAGAGACATTGCTGACACTACTGATGCTGTCCGTGATCCACAGACACTTGAGATT  
CTTGACATTACCCATGTTCTTTTGGTGGTGTGAGTGTATAACACCAGGAACAAATACTTCTAACCAGGTTG  
CTGTTCTTTATCAGGATGTTAACTGCACAGAAGTCCCTGTTGCTATTTCATGCAGATCAACTTACTCCTACTTG  
GCGTGTATTATTCTACAGTTCTAATGTTTTTCAAACACGTGCAGGCTGTTTAAATAGGGGCTGAACATGTCAAC  
AACTCATATGAGTGTGACATACCCATTGGTGCAGGTATATGCGCTAGTTATCAGACTCAGACTAATTTCTCCTC  
GGCGGGCACGTAGTGTAGCTAGTCAATCCATCATTGCCACACTATGTCACCTGGTGCAGAAAATTCAGTTGC  
TTACTCTAATAACTCTATTGCCATACCCACAAATTTTACTATTAGTGTACCACAGAAAATCTACCAGTGTCT  
ATGACCAAGACATCAGTAGATTGTACAATGTACATTTGTGGTGATTCAACTGAATGCAGCAATCTTTTGTGTC  
AATATGGCAGTTTTTGTACACAATTAACCGTGCTTTAACTGGAATAGCTGTTGAACAAGACAAAAACACCCA  
AGAAGTTTTTGCACAAGTCAAACAAATTTACAAAACACCACCAATTAAGATTTTTGGTGGTTTTAATTTTTTCA  
CAAATATTACCAGATCCATCAAACCAAGCAAGAGGTCAATTTATTGAAGATCTACTTTTTCAACAAAGTGACAC  
TTGCAGATGCTGGCTTCATCAAACAATATGGTGATTGCCCTGGTGATATTGCTGCTAGAGACCTCATTTGTGC  
ACAAAAGTTTTAACGGCCTTACTGTTTTGCCACCTTTGCTCACAGA

>R1\_12

ATGTTTGTTTTTCTTGTTTTTATTGCCACTAGTCTCTAGTCAGTGTGTTAATCTTACAACCAGAACTCAATTAC  
CCCCTGCATACACTAATTTCTTTCACACGTGGTGTATTACCCTGACAAAGTTTTTCAGATCCTCAGTTTTTACA  
TTCAACTCAGGACTTGTTCCTTACCTTTCTTTTCCAATGTTACTTGGTTCCATGCTATAACATGTCTCTGGGACC  
AATGGTACTAAGAGGTTTGATAACCCTGTCTTACCATTTAATGATGGTGTATTATTTTGTCTCCACTGAGAAGT  
CTAACATAATAAGAGGCTGGATTTTTGGTACTACTTTAGATTCGAAGACCCAGTCCCTACTTATTGTTAATAA  
CGTACTAATGTTGTTATTAAGTCTGTGAATTTCAATTTTGTAAATGATCCATTTTTGGGTGTTTATTACCAC  
AAAAACAACAAAAGTTGGATGGAAAGTGAGTTCAGAGTTTATTCTAGTGCGAATAATTGCACTTTTGAATATG  
TCTCTCAGCCTTTTCTTATGGACCTTGAAGGAAAACAGGGTAATTTCAAAAATCTTAGGGAATTTGTGTTAA  
GAATATTGATGGTTATTTTAAAATATATTCTAAGCACACGCCATTAAATTTAGTGCGTGATCTCCCTCAGGGT  
TTTTCGGCTTTAGAACCATTTGGTAGATTTGCCAATAGGTATTAACATCACTAGGTTTCAAACCTTTACTTGCTT  
TACATAGAAGTTATTTGACTCCTGGTGATTCTTCTTCAGGTTGGACAGCTGGTGCTGCAGCTTATTATGTGGG  
TTATCTTCAACCTAGGACTTTTCTATTAAAATATAATGAAAATGGAACCATTACAGATGCTGTAGACTGTGCA  
CTTGACCCTCTCTCAGAAAACAAAGTGTACGTTGAAATCCTTCAGTGTAGAAAAAGGAATCTATCAAACCTTCTA  
ACTTTAGAGTCCAACCAACAGAATCTATTGTTAGATTTCCCTAATATTACAAACTTGTGCCCTTTTGGTGAAGT  
TTTTAACGCCACCAGATTTGCATCTGTTTATGCTTGGAACAGGAAGAGAATCAGCAACTGTGTTGCTGATTAT  
TCTGTCCTATATAAATCCGCATCATTTTCCACTTTTAAAGTGTATGGAGTGTCTCCTACTAAATTAATGATC  
TCTGCTTTACTAATGTCTATGCAGATTCATTTGTAATTAGAGGTGATGAAGTCAGACAAATCGCTCCAGGGCA  
AACTGGAAAGATTGCTGATTATAATTATAAATTACCAGATGATTTTACAGGCTGCGTTATAGCTTGGAATTCT  
ACAATCTTGATTCTAAGGTTGGTGGTAATTATAATTACCTGTATAGATTGTTTAGGAAGTCTAATCTCAAAC  
CTTTTGAGAGAGATATTTCAACTGAAATCTATCAGGCTGGTAGCACACCTTGTAAATGGTGTGGAAGTTTTAA  
TTGTTACTTTTCTTTACAATCATATGGTTTTCCAACCCACTAATGGTGTGGTTACCAACCATACAGAGTAGTA  
GTACTTTCTTTTGAACTTCTACATGCACCAGCAACTGTTTGTGGACCTAAAAAGTCTACTAATTTGGTTAAAA  
ACAAATGTGTCAATTTCAACTTCAATGGTTTTAACAGGCACAGGTGTTCTTACTGAGTCTAACAAAAAGTTTCT



GCCTTTCCAACAATTTGGCAGAGACATTGCTGACACTACTGATGCTGTCCGTGATCCACAGACACTTGAGATT  
CTTGACATTACACCATGTTCTTTTGGTGGTGTGAGTGTATAACACCAGGAACAAATACTTCTAACCAGGTTG  
CTGTTCTTTATCAGGATGTTAACTGCACAGAAGTCCCTGTTGCTATTCATGCAGATCAACTTACTCCTACTTG  
GCGTGTTTATTCTACAGGTTCTAATGTTTTTCAAACACGTGCAGGCTGTTTAATAGGGGCTGAACATGTCAAC  
AACTCATATGAGTGTGACATACCCATTGGTGCAGGTATATGCGCTAGTTATCAGACTCAGACTAATTCTCCTC  
GGCGGGCACGTAGTGTAGCTAGTCAATCCATCATTGCCTACACTATGTCACCTGGTGCAGAAAATTCAGTTGC  
TTACTCTAATAACTCTATTGCCATACCCACAAATTTTACTATTAGTGTACCACAGAAAATTCACCAGTGTCT  
ATGACCAAGACATCAGTAGATTGTACAATGTACATTTGTGGTGATTCAACTGAATGCAGCAATCTTTTGTGGC  
AATATGGCAGTTTTTGTACACAATTAACCGTGTCTTAACTGGAATAGCTGTTGAACAAGACAAAAACACCCA  
AGAAGTTTTTGCACAAGTCAAACAAATTTACAAAACACCACCAATTAAGATTTTTGGTGGTTTTAATTTTTCA  
CAAATATTACCAGATCCATCAAACCAAGCAAGAGGTCAATTTATTGAAGATCTACTTTTCAACAAAGTGACAC  
TTGCAGATGCTGGCTTCATCAAACAATATGGTGATTGCCTTGGTGATATTGCTGCTAGAGACCTCATTTGTGC  
ACAAAAGTTTAACGGCCTTACTGTTTTGCCACCTTTGCTCACAGA

>R1\_13

ATGTTTGTTTTTCTTGTTTTATTGCCACTAGTCTCTAGTCAGTGTGTTAATCTTACAACCAGAACTCAATTAC  
CCCCTGCATACACTAATTCTTTCACACGTGGTGTATTACCCTGACAAAGTTTTTCAGATCCTCAGTTTTTACA  
TTCAACTCAGGACTTGTCTTACCTTTCTTTTCCAATGTTACTTGGTTCCATGCTATACATGTCTCTGGGACC  
AATGGTACTAAGAGGTTTGATAACCCTGTCTACCATTTAATGATGGTGTATTATTTGCTTCCACTGAGAAGT  
CTAACATAATAAGAGGCTGGATTTTTGGTACTACTTTAGATTGCAAGACCCAGTCCCTACTTATTGTTAATAA  
CGCTACTAATGTTGTTATTAAAGTCTGTGAATTTCAATTTTGTAAATGATCCATTTTTGGGTGTTTATTACCAC  
AAAAACAACAAAAGTTGGATGGAAAGTGAGTTCAGAGTTTATTCTAGTGCGAATAATTGCACTTTTGAATATG  
TCTCTCAGCCTTTTCTTATGGACCTTGAAGGAAAACAGGGTAATTTCAAAAATCTTAGGGAATTTGTGTTTAA  
GAATATTGATGGTTATTTTTAAAATATATTCTAAGCACACGCCTATTAATTTAGTGCGTGATCTCCCTCAGGGT  
TTTTCGGCTTTAGAACCATTTGGTAGATTTGCCAATAGGTATTAACATCACTAGGTTTCAAACCTTTACTTGCTT  
TACATAGAAGTTATTTGACTCCTGGTGAATCTTCTTCAGGTTGGACAGCTGGTGTGCAGCTTATTATGTGGG  
TTATCTTCAACCTAGGACTTTTCTATTAAAATATAATGAAAATGGAACCATTACAGATGCTGTAGACTGTGCA  
CTTGACCCTCTCTCAGAAAACAAAGTGTACGTTGAAAATCCTTCACTGTAGAAAAAGGAATCTATCAAACCTTCTA  
ACTTTAGAGTCCAACCAACAGAATCTATTGTTAGATTTCCCTAATATTACAAAACCTTGTGCCCTTTTGGTGAAGT  
TTTTAACGCCACCAGATTTGCATCTGTTTATGCTTGGAACAGGAAGAGAATCAGCAACTGTGTTGCTGATTAT  
TCTGTCTATATAATTCGCATCATTTTTCCACTTTTAAAGTGTATGGAGTGTCTCCTACTAAATTAATGATC  
TCTGCTTTACTAATGTCTATGCAGATTCATTTGTAATTAGAGGTGATGAAGTCAGACAAATCGCTCCAGGGCA  
AACTGGAAAGATTGCTGATTATAATTATAAATTACCAGATGATTTTACAGGCTGCGTTATAGCTTGGAAATCT  
ACAATCTTGATTCTAAGGTTGGTGGTAATTATAATTACCGGTATAGATTGTTTAGGAAGTCTAATCTCAAAC  
CTTTTGAGAGAGATATTTCAACTGAAATCTATCAGGCCGGTAGCACACCTTGTAAATGGTGTGGAAGTTTTAA  
TTGTTACTTTTCTTTACAATCATATGGTTTTCCAACCCACTAATGGTGTGGTTACCAACCATAACAGAGTAGTA  
GTACTTTCTTTTGAACCTTCTACATGCACCAGCAACTGTTTGTGGACCTAAAAAGTCTACTAATTTGGTTAAAA  
ACAAATGTGTCAATTTCAATTTCAATGGTTTAAACAGGCACAGGTGTTCTTACTGAGTCTAACAAAAGTTTCT  
GCCTTTCCAACAATTTGGCAGAGACATTGCTGACACTACTGATGCTGTCCGTGATCCACAGACACTTGAGATT  
CTTGACATTACACCATGTTCTTTTGGTGGTGTGAGTGTATAACACCAGGAACAAATACTTCTAACCAGGTTG  
CTGTTCTTTATCAGGATGTTAACTGCACAGAAGTCCCTGTTGCTATTCATGCAGATCAACTTACTCCTACTTG  
GCGTGTTTATTCTACAGGTTCTAATGTTTTTCAAACACGTGCAGGCTGTTTAATAGGGGCTGAACATGTCAAC  
AACTCATATGAGTGTGACATACCCATTGGTGCAGGTATATGCGCTAGTTATCAGACTCAGACTAATTCTCCTC  
GGCGGGCACGTAGTGTAGCTAGTCAATCCATCATTGCCTACACTATGTCACCTGGTGCAGAAAATTCAGTTGC  
TTACTCTAATAACTCTATTGCCATACCCACAAATTTTACTATTAGTGTACCACAGAAAATTCACCAGTGTCT  
ATGACCAAGACATCAGTAGATTGTACAATGTACATTTGTGGTGATTCAACTGAATGCAGCAATCTTTTGTGGC  
AATATGGCAGTTTTTGTACACAATTAACCGTGTCTTAACTGGAATAGCTGTTGAACAAGACAAAAACACCCA  
AGAAGTTTTTGCACAAGTCAAACAAATTTACAAAACACCACCAATTAAGATTTTTGGTGGTTTTAATTTTTCA  
CAAATATTACCAGATCCATCAAACCAAGCAAGAGGTCAATTTATTGAAGATCTACTTTTCAACAAAGTGACAC  
TTGCAGATGCTGGCTTCATCAAACAATATGGTGATTGCCTTGGTGATATTGCTGCTAGAGACCTCATTTGTGC  
ACAAAAGTTTAACGGCCTTACTGTTTTGCCACCTTTGCTCACAGA

>R1\_14

ATGTTTGTTTTTCTTGTTTTATTGCCACTAGTCTCTAGTCAGTGTGTTAATCTTACAACCAGAACTCAATTAC  
CCCCTGCATACACTAATTCTTTCACACGTGGTGTATTACCCTGACAAAGTTTTTCAGATCCTCAGTTTTTACA  
TTCAACTCAGGACTTGTCTTACCTTTCTTTTCCAATGTTACTTGGTTCCATGCTATACATGTCTCTGGGACC

AATGGTACTAAGAGGTTTGATAACCCTGTCCTACCATTTAATGATGGTGTTTATTTTGGCTTCCACTGAGAAGT  
CTAACATAATAAGAGGCTGGATTTTTGGTACTACTTTAGATTCTGAAGACCCAGTCCCTACTTATTGTTAATAA  
CGCTACTAATGTTGTTATTAAGTCTGTGAATTTCAATTTTGTAAATGATCCATTTTTGGGTGTTTATTACCAC  
AAAACAACAAAAGTTGGATGGAAAGTGAGTTCAGAGTTTATTCTAGTGCGAATAATTGCACCTTTGAATATG  
TCTCTCAGCCTTTTCTTATGGACCTTGAAGGAAAACAGGGTAATTTCAAAAATCTTAGGGAATTTGTGTTAA  
GAATATTGATGGTTATTTTAAAATATATTCTAAGCACACGCCATTAAATTTAGTGCGTGATCTCCCTCAGGGT  
TTTTCGGCTTTAGAACCATTTGGTAGATTTGCCAATAGGTATTAACATCACTAGGTTTCAAACCTTTACTTGCTT  
TACATAGAAGTTATTTGACTCCTGGTGATTCTTCTTCAGGTTGGACAGCTGGTGCTGCAGCTTATTATGTGGG  
TTATCTTCAACCTAGGACTTTTCTATTAAAATATAATGAAAATGGAACCATACAGATGCTGTAGACTGTGCA  
CTTGACCCTCTCTCAGAAAACAAAGTGACGTTGAAATCCTTCAGTGTAGAAAAAGGAATCTATCAAACCTTCTA  
ACTTTAGAGTCCAACCAACAGAATCTATTGTTAGATTTCTAATATTACAACTTGTGCCCTTTTGGTGAAGT  
TTTTAACGCCACCAGATTTGCATCTGTTTATGCTTGGAACAGGAAGAGAATCAGCAACTGTGTTGCTGATTAT  
TCTGTCTATATAAATCCGCATCATTTTCCACTTTTAAAGTGTATGGAGTGTCTCCTACTAAATTAATGATC  
TCTGCTTTACTAATGTCTATGCAGATTCATTTGTAATTAGAGGTGATGAAGTCAGACAAATCGCTCCAGGGCA  
AACTGGAAAGATTGCTGATTATAATTATAAATTACCAGATGATTTTACAGGCTGCGTTATAGCTTGGAAATCT  
ACAATCTTGATTCTAAGGTTGGTGGTAATTATAATTACCTTTATAGATTGTTTAGGAAGTCTAATCTCAAAC  
CTTTTGAGAGAGATATTTCAACTGAAATCTATCAGGCCGGTAGCACACCTTGTAAATGGTGTGGAAGTTTTAA  
TTGTTACTTTCTTTACAATCATATGGTTTTCAACCCACTAATGGTGTGGTTACCAACCATACAGAGTAGTA  
GTACTTTCTTTTGAACTTCTACATGCACCAGCAACTGTTTGTGGACCTAAAAAGTCTACTAATTTGGTTAAAA  
ACAAATGTGTCAATTTCAACTTCAATGGTTTTAACAGGCACAGGTGTTCTTACTGAGTCTAACAAAAAGTTTCT  
GCCTTTCCAACAATTTGGCAGAGACATTGCTGACACTACTGATGCTGTCCGTGATCCACAGACACTTGAGATT  
CTTGACATTACACCATGTTCTTTTGGTGGTGTGAGTGTATAACACCAGGAACAAATACTTCTAACCAGGTTG  
CTGTTCTTTATCAGGATGTTAACTGCACAGAAGTCCCTGTGCTATTTCATGCAGATCAACTTACTCCTACTTG  
GCGTGTATTATTCTACAGGTTCTAATGTTTTTCAAACACGTGCAGGCTGTTTAAATAGGGGCTGAACATGTCAAC  
AACTCATATGAGTGTGACATACCATTGGTGCAGGTATATGCGCTAGTTATCAGACTCAGACTAATCTCCTC  
GGCGGGCACGTAGTGTAGCTAGTCAATCCATCATTGCCACACTATGTCACTTGGTGCAGAAAATTCAGTTGC  
TTACTCTAATAACTCTATTGCCATACCACAAAATTTTACTATTAGTGTACCACAGAAAATCTACCAGTGTCT  
ATGACCAAGACATCAGTAGATTGTACAATGTACATTTGTGGTGAATCAACTGAATGCAGCAATCTTTTGTGTC  
AATATGGCAGTTTTTGTACACAATTAACCGTGCTTTAACTGGAATAGCTGTTGAACAAGACAAAACACCCA  
AGAAGTTTTTGCACAAGTCAAACAAATTTACAAAACACCACCAATTAAGATTTTTGGTGGTTTTAATTTTTTCA  
CAAATATTACCAGATCCATCAAACCAAGCAAGAGGTCAATTTATTGAAGATCTACTTTTTCAACAAAGTGACAC  
TTGCAGATGCTGGCTTCATCAAACAATATGGTGATTGCCTTGGTGATATTGCTGCTAGAGACCTCATTTGTGC  
ACAAAAGTTTAAACGGCTTACTGTTTTTGCACCTTTGCTCACAGA

>R1\_15

ATGTTTGTTTTTCTTGTTTTATTGCCACTAGTCTCTAGTCAGTGTGTTAATCTTACAACCAGAACTCAATTAC  
CCCCTGCATACACTAATTTCTTTCACACGTGGTGTATTACCCTGACAAAGTTTTTCAGATCCTCAGTTTTACA  
TTCAACTCAGGACTTGTCTTACCTTTCTTTTCCAATGTTACTTGGTTCATGCTATACATGTCTCTGGGACC  
AATGGTACTAAGAGGTTTGATAACCCTGTCCTACCATTTAATGATGGTGTTTATTTTGGCTTCCACTGAGAAGT  
CTAACATAATAAGAGGCTGGATTTTTGGTACTACTTTAGATTCTGAAGACCCAGTCCCTACTTATTGTTAATAA  
CGCTACTAATGTTGTTATTAAGTCTGTGAATTTCAATTTTGTAAATGATCCATTTTTGGGTGTTTATTACCAC  
AAAACAACAAAAGTTGGATGGAAAGTGAGTTCAGAGTTTATTCTAGTGCGAATAATTGCACCTTTGAATATG  
TCTCTCAGCCTTTTCTTATGGACCTTGAAGGAAAACAGGGTAATTTCAAAAATCTTAGGGAATTTGTGTTAA  
GAATATTGATGGTTATTTTAAAATATATTCTAAGCACACGCCATTAAATTTAGTGCGTGATCTCCCTCAGGGT  
TTTTCGGCTTTAGAACCATTTGGTAGATTTGCCAATAGGTATTAACATCACTAGGTTTCAAACCTTTACTTGCTT  
TACATAGAAGTTATTTGACTCCTGGTGATTCTTCTTCAGGTTGGACAGCTGGTGCTGCAGCTTATTATGTGGG  
TTATCTTCAACCTAGGACTTTTCTATTAAAATATAATGAAAATGGAACCATACAGATGCTGTAGACTGTGCA  
CTTGACCCTCTCTCAGAAAACAAAGTGACGTTGAAATCCTTCAGTGTAGAAAAAGGAATCTATCAAACCTTCTA  
ACTTTAGAGTCCAACCAACAGAATCTATTGTTAGATTTCTAATATTACAACTTGTGCCCTTTTGGTGAAGT  
TTTTAACGCCACCAGATTTGCATCTGTTTATGCTTGGAACAGGAAGAGAATCAGCAACTGTGTTGCTGATTAT  
TCTGTCTATATAAATCCGCATCATTTTCCACTTTTAAAGTGTATGGAGTGTCTCCTACTAAATTAATGATC  
TCTGCTTTACTAATGTCTATGCAGATTCATTTGTAATTAGAGGTGATGAAGTCAGACAAATCGCTCCAGGGCA  
AACTGGAAAGATTGCTGATTATAATTATAAATTACCAGATGATTTTACAGGCTGCGTTATAGCTTGGAAATCT  
ACAATCTTGATTCTAAGGTTGGTGGTAATTATAATTACCTGTATAGATTGTTTAGGAAGTCTAATCTCAAAC  
CTTTTGAGAGAGATATTTCAACTGAAATCTATCAGGCCGGTAGCACACCTTGTAAATGGTGTGGAAGTTTTAA

TTGTTACTTTTCCTTTACAATCATATGGTTTTCCAACCCACTAATGGTGTGGTTACCAACCATAACAGAGTAGTA  
GTACTTTCTTTTGAACTTCTACATGCACCAGCAACTGTTTGTGGACCTAAAAAGTCTACTAATTTGGTTAAAA  
ACAAATGTGTCAATTTCAACTTCAATGGTTTAAACAGGCACAGGTGTTCTTACTGAGTCTAACAAAAAGTTTCT  
GCCTTTCCAACAATTTGGCAGAGACATTGCTGACACTACTGATGCTGTCCGTGATCCACAGACACTTGAGATT  
CTTGACATTACACCATGCTCTTTTGGTGGTGTGAGTGTATAACACCAGGAACAAATACTTCTAACCAGGTTG  
CTGTTCTTTATCAGGATGTTAACTGCACAGAAGTCCCTGTTGCTATTCATGCAGATCAACTTACTCCTACTTG  
GCGTGTTTATTCTACAGGTTCTAATGTTTTTCAAACACGTGCAGGCTGTTTAATAGGGGCTGAACATGTCAAC  
AACTCATATGAGTGTGACATACCCATTGGTGCAGGTATATGCGCTAGTTATCAGACTCAGACTAATTCTCCTC  
GGCGGGCACGTAGTGTAGCTAGTCAATCCATCATTGCCTACACTATGTCACCTGGTGCAGAAAATTCAGTTGC  
TTACTCTAATAACTCTATTGCCATACCCACAAATTTTACTATTAGTGTACCACAGAAAATTCACCAGTGTCT  
ATGACCAAGACATCAGTAGATTGTACAATGTACATTTGTGGTGATTCAACTGAATGCAGCAATCTTTTGTTC  
AATATGGCAGTTTTTGTACACAATTAACCGTGTCTTAACTGGAATAGCTGTTGAACAAGACAAAAACACCCA  
AGAAGTTTTTGCACAAGTCAAACAATTTACAAAACACCACCAATTAAGATTTTTGGTGGTTTTAATTTTTTCA  
CAAATATTACCAGATCCATCAAACCAAGCAAGAGGTCAATTTATTGAAGATCTACTTTTCAACAAAGTGACAC  
TTGCAGATGCTGGCTTCATCAAACAATATGGTGATTGCCTTGGTGATATTGCTGCTAGAGACCTCATTGTGC  
ACAAAAGTTTAAACGGCCTTACTGTTTTGCCACCTTTGCTCACAGA

>R1\_18

ATGTTTGTTTTTCTTGTTTTATTGCCACTAGTCTCTAGTCAGTGTGTTAATCTTACAACCAGAACTCAATTAC  
CCCCTGCATACACTAATTCCTTTCACACGTGGTGTATTATTACCCTGACAAAGTTTTTCAGATCCTCAGTTTTACA  
TTCAACTCAGGACTTGTCTTACCTTTCTTTTCCAATGTTACTTGGTTCCATGCTATAACATGTCTCTGGGACC  
AATGGTACTAAGAGGTTTGATAACCCTGTCTTACCATTAAATGATGGTGTATTATTTGCTTCCACTGAGAAGT  
CTAACATAATAAGAGGCTGGATTTTTGGTACTACTTTAGATTGGAAGACCCAGTCCCTACTTATTGTTAATAA  
CGTACTAATGTTGTTATTAAAGTCTGTGAATTTCAATTTGTAATGATCCATTTTTGGGTGTTTATTACCAC  
AAAAACAACAAAAGTTGGATGGAAAGTGAGTTCAGAGTTTATTCTAGTGCGAATAATTGCACTTTTTGAATATG  
TCTCTCAGCCTTTTCTTATGGACCTTGAAGGAAAACAGGGTAATTTCAAAAATCTTAGGGAATTTGTGTTTAA  
GAATATTGATGGTTATTTTTAAAATATATTCTAAGCACACGCCTATTAATTTAGTGCGTGATCTCCCTCAGGGT  
TTTTCGGCTTTAGAACCATTTGGTAGATTTGCCAATAGGTATTAACATCACTAGGTTTTCAAACCTTTACTTGCTT  
TACATAGAAGTTATTTGACTCCTGGTGATTCTTCTTTCAGGTTGGACAGCTGGTGTGCAGCTTATTATGTGGG  
TTATCTTCAACCTAGGACTTTTCTATTAAAATATAATGAAAATGGAACCATTACAGATGCTGTAGACTGTGCA  
CTTGACCCTCTCTCAGAAAACAAAGTGTACGTTGAAAATCCTTCACTGTAGAAAAAGGAATCTATCAAACCTTCTA  
ACTTTAGAGTCCAACCAACAGAATCTATTGTTAGATTTCCATAATATTACAACTTGTGCCCTTTTGGTGAAGT  
TTTTAACGCCACCAGATTTGCATCTGTTTATGCTTGGAACAGGAAGAGAATCAGCAACTGTGTTGCTGATTAT  
TCTGTCTATATAATTCGCATCATTTTTCCACTTTTAAAGTGTATGGAGTGTCTCCTACTAAATTAATGATC  
TCTGCTTTACTAATGTCTATGCAGATTCATTTGTAATTAGAGGTGATGAAGTCAGACAAATCGCTCCAGGGCA  
AACTGGAAAGATTGCTGATTATAATTATAAATTACCAGATGATTTTACAGGCTGCGTTATAGCTTGGAAATCT  
ACAATCTTGATTCTAAGGTTGGTGGTAATTATAATTACCTGTATAGATTGTTTAGGAAGTCTAATCTCAAAC  
CTTTTGAGAGAGATATTTCAACTGAAATCTATCAGGCCGGTAGCAAACCTTGTAAATGGTGTGGAAGTTTTAA  
TTGTTACTTTTCCTTTACAATCATATGGTTTTCCAACCCACTAATGGTGTGGTTACCAACCATAACAGAGTAGTA  
GTACTTTCTTTTGAACTTCTACATGCACCAGCAACTGTTTGTGGACCTAAAAAGTCTACTAATTTGGTTAAAA  
ACAAATGTGTCAATTTCAACTTCAATGGTTTAAACAGGCACAGGTGTTCTTACTGAGTCTAACAAAAAGTTTCT  
GCCTTTCCAACAATTTGGCAGAGACATTGCTGACACTACTGATGCTGTCCGTGATCCACAGACACTTGAGATT  
CTTGACATTACACCATGTTCTTTTGGTGGTGTGAGTGTATAACACCAGGAACAAATACTTCTAACCAGGTTG  
CTGTTCTTTATCAGGATGTTAACTGCACAGAAGTCCCTGTTGCTATTCATGCAGATCAACTTACTCCTACTTG  
GCGTGTTTATTCTACAGGTTCTAATGTTTTTCAAACACGTGCAGGCTGTTTAATAGGGGCTGAACATGTCAAC  
AACTCATATGAGTGTGACATACCCATTGGTGCAGGTATATGCGCTAGTTATCAGACTCAGACTAATTCTCCTC  
GGCGGGCACGTAGTGTAGCTAGTCAATCCATCATTGCCTACACTATGTCACCTGGTGCAGAAAATTCAGTTGC  
TTACTCTAATAACTCTATTGCCATACCCACAAATTTTACTATTAGTGTACCACAGAAAATTCACCAGTGTCT  
ATGACCAAGACATCAGTAGATTGTACAATGTACATTTGTGGTGATTCAACTGAATGCAGCAATCTTTTGTTC  
AATATGGCAGTTTTTGTACACAATTAACCGTGTCTTAACTGGAATAGCTGTTGAACAAGACAAAAACACCCA  
AGAAGTTTTTGCACAAGTCAAACAATTTACAAAACACCACCAATTAAGATTTTTGGTGGTTTTAATTTTTTCA  
CAAATATTACCAGATCCATCAAACCAAGCAAGAGGTCAATTTATTGAAGATCTACTTTTCAACAAAGTGACAC  
TTGCAGATGCTGGCTTCATCAAACAATATGGTGATTGCCTTGGTGATATTGCTGCTAGAGACCTCATTGTGC  
ACAAAAGTTTAAACGGCCTTACTGTTTTGCCACCTTTGCTCACAGA

>R1\_16

ATGTTTGTGTTTTCTTGTTTTATTGCCACTAGTCTCTAGTCAGTGTGTTAATCTTACAACCAGAACTCAATTAC  
CCCCTGCATACACTAATTCTTTCACACGTGGTGTGTTATTACCCTGACAAAGTTTTTCAGATCCTCAGTTTTTACA  
TTCAACTCAGGACTTGTTCTTACCTTTCTTTTCCAATGTTACTTGGTTCCATGCTATAACATGTCTCTGGGACC  
AATGGTACTAAGAGGTTTGATAACCCTGTCCTACCATTTAATGATGGTGTGTTATTTTGGTTCCACTGAGAAGT  
CTAACATAATAAGAGGCTGGATTTTTGGTACTACTTTAGATTCTGAAGACCCAGTCCCTACTTATTGTTAATAA  
CGCTACTAATGTTGTTATTAAAGTCTGTGAATTTCAATTTTGTAAATGATCCATTTTTGGGTGTTTATTACCAC  
AAAAACAACAAAAGTTGGATGGAAAGTGAGTTCAGAGTTTATTCTAGTGCGAATAATTGCACTTTTGAATATG  
TCTCTCAGCCTTTTCTTATGGACCTTGAAGGAAAACAGGGTAATTTCAAAAATCTTAGGGAATTTGTGTTTAA  
GAATATTGATGGTTATTTTAAAATATATTCTAAGCACACGCCTATTAATTTAGTGCGTGATCTCCCTCAGGGT  
TTTTCGGCTTTAGAACCATTTGGTAGATTTGCCAATAGGTATTAACATCACTAGGTTTCAAACCTTACTTGCTT  
TACATAGAAGTTATTTGACTCCTGGTGATTCTTCTTCAGGTTGGACAGCTGGTGCTGCAGCTTATTATGTGGG  
TTATCTTCAACCTAGGACTTTTCTATTAAAATATAATGAAAATGGAACCATACAGATGCTGTAGACTGTGCA  
CTTGACCCTCTCTCAGAAACAAAAGTGTACGTTGAAATCCTTCAGTGTAGAAAAAGGAATCTATCAAACCTCTA  
ACTTTAGAGTCCAACCAACAGAATCTATTGTTAGATTTCTTAATATTACAACTTGTGCCCTTTTGGTGAAGT  
TTTTAACGCCACCAGATTTGCATCTGTTTATGCTTGGAACAGGAAGAGAATCAGCAACTGTGTTGCTGATTAT  
TCTGTCCCTATATAATTCGCATCATTTTTCCACTTTTAAAGTGTATGGAGTGTCTCCTACTAAATTAATGATC  
TCTGCTTTACTAATGTCTATGCAGATTCATTTGTAATTAGAGGTGATGAAGTCAGACAAATCGCTCCAGGGCA  
AACTGGAAAGATTGCTGATTATAATTATAAATTACCAGATGATTTTACAGGCTGCGTTATAGCTTGGAAATCT  
ACAATCTTGATTCTAAGGTTGGTGGTAATTATAATTACCTGTATAGATTGTTTAGGAAGTCTAATCTCAAAC  
CTTTTGAGAGAGATATTTCAACTGAAATCTATCAGGCCGGTAGCACACCTTGTAAATGGTGTGGAAGTTTTAA  
TTGTTACTTTTCTTTACAATCATATGGTTTTCAACCCACTAATGGTGTGGTTACCAACCATACAGAGTAGTA  
GTACTTTCTTTTGAACTTCTACATGCACCAGCAACTGTTTGTGGACCTAAAAAGTCTACTAATTTGGTTAAAA  
ACAAATGTGTCAATTTCAATTTCAATGGTTTTAACAGGCACAGGTGTTCTTACTGAGTCTAACAAAAGTTTTCT  
GCCTTTCCAACAATTTGGCAGAGACATTGCTGACACTACTGATGCTGTCCGTGATCCACAGACACTTGAGATT  
CTTGACATTACACCATGTTCTTTTGGTGGTGTGAGTGTATAACACCAGGAACAAATACCTTCAACCAGGTTG  
CTGTTCTTTATCAGGATGTTAACTGCACAGAAGTCCCTGTTGCTATTCATGCAGATCAACTTACTCCTACTTG  
GCGTGTGTTTATTCTACAGGTTCTAATGTTTTTCAAACACGTGCAGGCTGTTTAAATAGGGGCTGAACATGTCAAC  
AACTCATATGAGTGTGACATACCCATTGGTGCAGGTATATGCGCTAGTTATCAGACTCAGACTAATTTCTCCTC  
GGCGGGCACGTAGTGTAGCTAGTCAATCCATCATTGCCCTACACTATGTCACTTGGTGCAGAAAATTCAGTTGC  
TTACTCTAATAACTCTATTGCCATACCCACAAATTTTACTATTAGTGTTACCACAGAAAATTCACCAGTGTCT  
ATGACCAAGACATCAGTAGATTGTACAATGTACATTTGTGGTGAATCAACTGAATGCAGCAATCTTTTGTGTC  
AATATGGCAGTTTTTTGTACACAATTAACCGTGTCTTTAACTGGAATAGCTGTTGAACAAGACAAAACACCCA  
AGAAGTTTTTGCACAAGTCAAACAAATTTACAAAACACCACCAATTAAGATTTTTGGTGGTTTTAATTTTTTCA  
CAAATATTACCAGATCCATCAAACCAAGCAAGAGGTCAATTTATTGAAGATCTACTTTTCAACAAAGTGACAC  
TTGCAGATGCTGGCTTCATCAAACAATATGGTGATTGCCTTGGTGATATTGCTGCTAGAGACCTCATTTGTGC  
ACAAAAGTTAACGGCCTTACTGTTTTGCCACCTTTGCTCACAGA

>R1\_17

ATGTTTGTGTTTTCTTGTTTTATTGCCACTAGTCTCTAGTCAGTGTGTTAATCTTACAACCAGAACTCAATTAC  
CCCCTGCATACACTAATTCTTTCACACGTGGTGTGTTATTACCCTGACAAAGTTTTTCAGATCCTCAGTTTTTACA  
TTCAACTCAGGACTTGTTCTTACCTTTCTTTTCCAATGTTACTTGGTTCCATGCTATAACATGTCTCTGGGACC  
AATGGTACTAAGAGGTTTGATAACCCTGTCCTACCATTTAATGATGGTGTGTTATTTTGGTTCCACTGAGAAGT  
CTAACATAATAAGAGGCTGGATTTTTGGTACTACTTTAGATTCTGAAGACCCAGTCCCTACTTATTGTTAATAA  
CGCTACTAATGTTGTTATTAAAGTCTGTGAATTTCAATTTTGTAAATGATCCATTTTTGGGTGTTTATTACCAC  
AAAAACAACAAAAGTTGGATGGAAAGTGAGTTCAGAGTTTATTCTAGTGCGAATAATTGCACTTTTGAATATG  
TCTCTCAGCCTTTTCTTATGGACCTTGAAGGAAAACAGGGTAATTTCAAAAATCTTAGGGAATTTGTGTTTAA  
GAATATTGATGGTTATTTTAAAATATATTCTAAGCACACGCCTATTAATTTAGTGCGTGATCTCCCTCAGGGT  
TTTTCGGCTTTAGAACCATTTGGTAGATTTGCCAATAGGTATTAACATCACTAGGTTTCAAACCTTACTTGCTT  
TACATAGAAGTTATTTGACTCCTGGTGATTCTTCTTCAGGTTGGACAGCTGGTGCTGCAGCTTATTATGTGGG  
TTATCTTCAACCTAGGACTTTTCTATTAAAATATAATGAAAATGGAACCATACAGATGCTGTAGACTGTGCA  
CTTGACCCTCTCTCAGAAACAAAAGTGTACGTTGAAATCCTTCAGTGTAGAAAAAGGAATCTATCAAACCTCTA  
ACTTTAGAGTCCAACCAACAGAATCTATTGTTAGATTTCTTAATATTACAACTTGTGCCCTTTTGGTGAAGT  
TTTTAACGCCACCAGATTTGCATCTGTTTATGCTTGGAACAGGAAGAGAATCAGCAACTGTGTTGCTGATTAT  
TCTGTCCCTATATAATTCGCATCATTTTTCCACTTTTAAAGTGTATGGAGTGTCTCCTACTAAATTAATGATC  
TCTGCTTTACTAATGTCTATGCAGATTCATTTGTAATTAGAGGTGATGAAGTCAGACAAATCGCTCCAGGGCA

AACTGGAAAGATTGCTGATTATAATTATAAATTACCAGATGATTTTACAGGCTGCGTTATAGCTTGGAAATTCT  
ACAATCTTGATTCTAAGGTTGGTGGTAATTATAATTACCGGTATAGATTGTTTAGGAAGTCTAATCTCAAAC  
CTTTTGAGAGAGATATTTCAACTGAAATCTATCAGGCCGGTAGCACACCTTGTAATGGTGTGGAAGTTTTAA  
TTGTTACTTTTCTTTTACAATCATATGGTTTTCCAACCCACTAATGGTGTGGTTACCAACCATAACAGAGTAGTA  
GTACTTTCTTTTGAACTTCTACATGCACCAGCAACTGTTTGTGGACCTAAAAAGTCTACTAATTTGGTTAAAA  
ACAAATGTGTCAATTTCAACTTCAATGGTTTTAACAGGCACAGGTGTTCTTACTGAGTCTAACAAAAAGTTTCT  
GCCTTTCCAACAATTTGGCAGAGACATTGCTGACATTACTGATGCTGTCCGTGATCCACAGACACTTGAGATT  
CTTGACATTACACCATGTTCTTTTGGTGGTGTGAGTGTATAACACCAGGAACAAATACTTCTAACCAGGTTG  
CTGTTCTTTATCAGGATGTTAACTGCACAGAAGTCCCTGTTGCTATTCATGCAGATCAACTTACTCCTACTTG  
GCGTGTTTATTCTACAGGTTCTAATGTTTTTCAAACACGTGCAGGCTGTTTAATAGGGGCTGAACATGTCAAC  
AACTCATATGAGTGTGACATACCCATTGGTGCAGGTATATGCGCTAGTTATCAGACTCAGACTAATTCTCCTC  
GGCGGGCACGTAGTGTAGCTAGTCAATCCATCATTGCCTACACTATGTCACTTGGTGCAGAAAATTCAGTTGC  
TTACTCTAATAACTCTATTGCCATACCCACAAATTTTACTATTAGTGTACCACAGAAAATTCACCAGTGTCT  
ATGACCAAGACATCAGTAGATTGTACAATGTACATTTGTGGTGAATCAACTGAATGCAGCAATCTTTTGTGTC  
AATATGGCAGTTTTTGTACACAATTAACCGTGTCTTAACTGGAATAGCTGTTGAACAAGACAAAAACACCCA  
AGAAGTTTTTGCACAAGTCAAACAATTTACAAAACACCACCAATTAAGATTTTTGGTGGTTTTAATTTTTTCA  
CAAATATTACCAGATCCATCAAACCAAGCAAGAGGTCAATTTATTGAAGATCTACTTTTCAACAAAGTGACAC  
TTGCAGATGCTGGCTTCATCAAACAATATGGTGAATTGCCTTGGTGAATTTGCTGCTAGAGACCTCATTTGTGC  
ACAAAAGTTTTAACGGCCTTACTGTTTTGCCACCTTTGCTCACAGA

>R1\_19

ATGTTTGTTTTTCTTGTTTTATTGCCACTAGTCTCTAGTCAGTGTGTTAATCTTACAACCAGAACTCAATTAC  
CCCCTGCATACACTAATTTCTTTCACACGTGGTGTGTTATTACCCTGACAAAGTTTTTCAGATCCTCAGTTTTACA  
TTCAACTCAGGACTTGTTCTTACCTTTCTTTTCCAATGTTACTTGGTTCCATGCTATAACATGTCTCTGGGACC  
AATGGTACTAAGAGGTTTGATAACCCTGTCTTACCATTTAATGATGGTGTGTTATTTTTGCTTCCACTGAGAAGT  
CTAACATAATAAGAGGCTGGATTTTTGGTACTACTTTAGATTGCAAGACCCAGTCCCTACTTATTGTTAATAA  
CGTACTAATGTTGTTATTAAGTCTGTGAATTTCAATTTGTAATGATCCATTTTTGGGTGTTTTATTACCAC  
AAAAACAACAAAAGTTGGATGGAAGTGAGTTCAGAGTTTATTCTAGTGCGAATAATTGCACCTTTTGAATATG  
TCTCTCAGCCTTTTTCTTATGGACCTTGAAGGAAAACAGGGTAATTTCAAAAATCTTAGGGAATTTGTGTTAA  
GAATATTGATGGTTATTTTTAAAATATATTCTAAGCACACGCCTATTAATTTAGTGCCTGATCTCCCTCAGGGT  
TTTTCGGCTTTAGAACCATTTGGTAGATTTGCCAATAGGTATTAACATCACTAGGTTTTCAAACCTTTACTTGCTT  
TACATAGAAGTTATTTGACTCCTGGTGAATTTCTTTCAGGTTGGACAGCTGGTGTGCAGCTTATTATGTGGG  
TTATCTTCAACCTAGGACTTTTCTATTAAAATATAATGAAAATGGAACCATTAACAGATGCTGTAGACTGTGCA  
CTTGACCCTCTCTCAGAAAACAAAGTGTACGTTGAAATCCTTCACTGTAGAAAAAGGAATCTATCAAACCTTCTA  
ACTTTAGAGTCCAACCAACAGAATCTATTGTTAGATTTCCATAATTAACAACTTGTGCCCTTTTGGTGAAGT  
TTTTAACGCCACCAGATTTGCATCTGTTTATGCTTGGAACAGGAAGAGAATCAGCAACTGTGTTGCTGATTAT  
TCTGTCTATATAATTCGCATCATTTTCCACTTTTAAAGTGTATGGAGTGTCTCCTACTAAATTAATGATC  
TCTGCTTTACTAATGTCTATGCAGATTCATTTGTAATTAGAGGTGATGAAGTCAGACAAATCGCTCCAGGGCA  
AACTGGAAAGATTGCTGATTATAATTATAAATTACCAGATGATTTTACAGGCTGCGTTATAGCTTGGAAATTCT  
ACAATCTTGATTCTAAGGTTGGTGGTAATTATAATTACCTGTATAGATTGTTTAGGAAGTCTAATCTCAAAC  
CTTTTGAGAGAGATATTTCAACTGAAATCTATCAGGCCGGTAGCACACCTTGTAATGGTGTGGAAGTTTTAA  
TTGTTACTTTTCTTTTACAATCATATGGTTTTCCAACCCACTAATGGTGTGGTTACCAACCATAACAGAGTAGTA  
GTACTTTCTTTTGAACTTCTACATGCACCAGCAACTGTTTGTGGACCTAAAAAGTCTACTAATTTGGTTAAAA  
ACAAATGTGTCAATTTCAACTTCAATGGTTTTAACAGGCACAGGTGTTCTTACTGAGTCTAACAAAAAGTTTCT  
GCCTTTCCAACAATTTGGCAGAGACATTGTTGACACTACTGATGCTGTCCGTGATCCACAGACACTTGAGATT  
CTTGACATTACACCATGTTCTTTTGGTGGTGTGAGTGTATAACACCAGGAACAAATACTTCTAACCAGGTTG  
CTGTTCTTTATCAGGATGTTAACTGCACAGAAGTCCCTGTTGCTATTCATGCAGATCAACTTACTCCTACTTG  
GCGTGTGTTATTCTACAGGTTCTAATGTTTTTCAAACACGTGCAGGCTGTTTAATAGGGGCTGAACATGTCAAC  
AACTCATATGAGTGTGACATACCCATTGGTGCAGGTATATGCGCTAGTTATCAGACTCAGACTAATTCTCCTC  
GGCGGGCACGTAGTGTAGCTAGTCAATCCATCATTGCCTACACTATGTCACTTGGTGCAGAAAATTCAGTTGC  
TTACTCTAATAACTCTATTGCCATACCCACAAATTTTACTATTAGTGTACCACAGAAAATTCACCAGTGTCT  
ATGACCAAGACATCAGTAGATTGTACAATGTACATTTGTGGTGAATCAACTGAATGCAGCAATCTTTTGTGTC  
AATATGGCAGTTTTTGTACACAATTAACCGTGTCTTAACTGGAATAGCTGTTGAACAAGACAAAAACACCCA  
AGAAGTTTTTGCACAAGTCAAACAATTTACAAAACACCACCAATTAAGATTTTTGGTGGTTTTAATTTTTTCA  
CAAATATTACCAGATCCATCAAACCAAGCAAGAGGTCAATTTATTGAAGATCTACTTTTCAACAAAGTGACAC

TTGCAGATGCTGGCTTCATCAAACAATATGGTGATTGCCTTGGTGATATTGCTGCTAGAGACCTCATTGTGC  
ACAAAAGTTTAACGGCCTTACTGTTTTGCCACCTTTGCTCACAGA

>R1\_20

ATGTTTGTGTTTTCTTGTTTTATTGCCACTAGTCTCTAGTCAGTGTGTTAATCTTACAACCAGAACTCAATTAC  
CCCCTGCATACACTAATTCTTTCACACGTGGTGTGTTATTACCCTGACAAAGTTTTTCAGATCCTCAGTTTTACA  
TTCAACTCAGGACTTGTTCTTACCTTTCTTTTCCAATGTTACTTGGTTCCATGCTATAACATGTCTCTGGGACC  
AATGGTACTAAGAGGTTTGATAACCCTGTCCTACCATTTAATGATGGTGTGTTATTTTGTCTCCACTGAGAAGT  
CTAACATAATAAGAGGCTGGATTTTTGGTACTACTTTAGATTGCGAAGACCCAGTCCCTACTTATTGTTAATAA  
CGCTACTAATGTTGTTATTAAAGTCTGTGAATTTCAATTTTGTAAATGATCCATTTTTGGGTGTTTATTACCAC  
AAAAACAACAAAAGTTGGATGGAAAGTGAGTTCAGAGTTTATTCTAGTGCGAATAATTGCACTTTTGAATATG  
TCTCTCAGCCTTTTCTTATGGACCTTGAAGGAAAACAGGGTAATTTCAAAAATCTTAGGGAATTTGTGTTTAA  
GAATATTGATGGTTATTTTAAAATATATTCTAAGCACACGCCTATTAATTTAGTGCGTGATCTCCCTCAGGGT  
TTTTCGGCTTTAGAACCATTTGGTAGATTTGCCAATAGGTATTAACATCACTAGGTTTCAAACCTTACTTGCTT  
TACATAGAAGTTATTTGACTCCTGGTGATTCTTCTTCAGGTTGGACAGCTGGTGCTGCAGCTTATTATGTGGG  
TTATCTTCAACCTAGGACTTTTCTATTTAAAATATAATGAAAATGGAACCATACAGATGCTGTAGACTGTGCA  
CTTGACCCTCTCTCAGAAACAAAGTGTACGTTGAAATCCTTCACTGTAGAAAAAGGAATCTATCAAACCTTCTA  
ACTTTAGAGTCCAACCAACAGAATCTATTGTTAGATTTCTTAATATTACAAACTTGTGCCCTTTTGGTGAAGT  
TTTTAACGCCACCAGATTTGCATCTGTTTATGCTTGGAACAGGAAGAGAATCAGCAACTGTGTTGCTGATTAT  
TCTGTCCATATAAATCCGCATCATTTTTCCACTTTTAAAGTGTATGGAGTGTCTCCTACTAAATTAATGATC  
TCTGCTTTACTAATGTCTATGCAGATTCATTTGTAATTAGAGGTGATGAAGTCAGACAAATCGCTCCAGGGCA  
AACTGGAAAGATTGCTGATTATAATTATAAATTACCAGATGATTTTACAGGCTGCGTTATAGCTTGGAAATCT  
ACAATCTTGATTCTAAGGTTGGTGGTAATTATAATTACCTGTATAGATTTTTTAGGAAGTCTAATCTCAAAC  
CTTTTGAGAGAGATATTTCAACTGAAATCTATCAGGCCGGTAGCACACCTTGTAAATGGTGTGGAAGTTTTAA  
TTGTTACTTTTCTTTACAATCATATGGTTTTCCAACCCACTAATGGTGTGGTTACCAACCATACAGAGTAGTA  
GTACTTTCTTTTGAACTTCTACATGCACCAGCAACTGTTTGTGGACCTAAAAAGTCTACTAATTTGGTTAAAA  
ACAAATGTGTCAATTTCAACTTCAATGGTTTTAACAGGCACAGGTGTTCTTACTGAGTCTAACAAAAAGTTTCT  
GCCTTTCCAACAATTTGGCAGAGACATTGCTGACACTACTGATGCTGTCCGTGATCCACAGACACTTGAGATT  
CTTGACATTACACCATGTTCTTTTGGTGGTGTGAGTGTATAACACCAGGAACAAATACTTCTAACCAGGTTG  
CTGTTCTTTATCAGGATGTTAACTGCACAGAAGTCCCTGTTGCTATTCATGCAGATCAACTTACTCCTACTTG  
GCGTGTGTTATTCTACAGGTTCTAATGTTTTTCAAACACGTGCAGGCTGTTTAAATAGGGGCTGAACATGTCAAC  
AACTCATATGAGTGTGACATACCCATTGGTGCAGGTATATGCGCTAGTTATCAGACTCAGACTAATTTCTCCTC  
GGCGGGCACGTAGTGTAGCTAGTCAATCCATCATTGCCACACTATGTCACCTTGGTGCAGAAAATTCAGTTGC  
TTACTCTAATAACTCTATTGCCATACCCACAAATTTTACTATTAGTGTACCACAGAAAATCTACCAGTGTCT  
ATGACCAAGACATCAGTAGATTGTACAATGTACATTTGTGGTGAATCAACTGAATGCAGCAATCTTTTGTGTC  
AATATGGCAGTTTTTGTACACAATTAACCGTGCTTTAACTGGAATAGCTGTTGAACAAGACAAAAACCCCA  
AGAAGTTTTTGCACAAGTCAAACAAATTTACAAAACACCACCAATTAAGATTTTTGGTGGTTTTAATTTTTCA  
CAAATATTACCAGATCCATCAAACCAAGCAAGAGGTCAATTTATTGAAGATCTACTTTTCAACAAAGTGACAC  
TTGCAGATGCTGGCTTCATCAAACAATATGGTGATTGCCTTGGTGATATTGCTGCTAGAGACCTCATTGTGC  
ACAAAAGTTTAACGGCCTTACTGTTTTGCCACCTTTGCTCACAGA

>R1\_21

ATGTTTGTGTTTTCTTGTTTTATTGCCACTAGTCTCTAGTCAGTGTGTTAATCTTACAACCAGAACTCAATTAC  
CCCCTGCATACACTAATTCTTTCACACGTGGTGTGTTATTACCCTGACAAAGTTTTTCAGATCCTCAGTTTTACA  
TTCAACTCAGGACTTGTTCTTACCTTTCTTTTCCAATGTTACTTGGTTCCATGCTATAACATGTCTCTGGGACC  
AATGGTACTAAGAGGTTTGATAACCCTGTCCTACCATTTAATGATGGTGTGTTATTTTGTCTCCACTGAGAAGT  
CTAACATAATAAGAGGCTGGATTTTTGGTACTACTTTAGATTGCGAAGACCCAGTCCCTACTTATTGTTAATAA  
CGCTACTAATGTTGTTATTAAAGTCTGTGAATTTCAATTTTGTAAATGATCCATTTTTGGGTGTTTATTACCAC  
AAAAACAACAAAAGTTGGATGGAAAGTGAGTTCAGAGTTTATTCTAGTGCGAATAATTGCACTTTTGAATATG  
TCTCTCAGCCTTTTCTTATGGACCTTGAAGGAAAACAGGGTAATTTCAAAAATCTTAGGGAATTTGTGTTTAA  
GAATATTGATGGTTATTTTAAAATATATTCTAAGCACACGCCTATTAATTTAGTGCGTGATCTCCCTCAGGGT  
TTTTCGGCTTTAGAACCATTTGGTAGATTTGCCAATAGGTATTAACATCACTAGGTTTCAAACCTTACTTGCTT  
TACATAGAAGTTATTTGACTCCTGGTGATTCTTCTTCAGGTTGGACAGCTGGTGCTGCAGCTTATTATGTGGG  
TTATCTTCAACCTAGGACTTTTCTATTTAAAATATAATGAAAATGGAACCATACAGATGCTGTAGACTGTGCA  
CTTGACCCTCTCTCAGAAACAAAGTGTACGTTGAAATCCTTCACTGTAGAAAAAGGAATCTATCAAACCTTCTA  
ACTTTAGAGTCCAACCAACAGAATCTATTGTTAGATTTCTTAATATTACAAACTTGTGCCCTTTTGGTGAAGT

TTTTAACGCCACCAGATTTGCATCTGTTTATGCTTGGAACAGGAAGAGAATCAGCAACTGTGTTGCTGATTAT  
TCTGTCCTATATAAATCCGCATCATTTTCCACTTTTAAAGTGTATGGAGTGTCTCCTACTAAATTAATGATC  
TCTGCTTTACTAATGTCTATGCAGATTCATTTGTAATTAGAGGTGATGAAGTCAGACAAATCGCTCCAGGGCA  
AACTGGAAAGATTGCTGATTATAAATTATAAATTACCAGATGATTTTACAGGCTGCGTTATAGCTTGGAAATTCT  
ACAATCTTGATTCTAAGGTTGGGGTAATTATAATTACCTGTATAGATTGTTTAGGAAGTCTAATCTCAAAC  
CTTTTGAGAGAGATATTTCAACTGAAATCTATCAGGCCGGTAGCACACCTTGTAAATGGTGTGAAGTTTTAA  
TTGTTACTTTTCTTTACAATCATATGGTTTTCCAACCCACTAATGGTGTGGTTACCAACCATAACAGAGTAGTA  
GTACTTTCTTTTGAACTTCTACATGCACCAGCAACTGTTTGTGGACCTAAAAAGTCTACTAATTTGGTTAAAA  
ACAAATGTGTCAATTTCAACTTCAATGGTTTTAACAGGCACAGGTGTTCTTACTGAGTCTAACAAAAAGTTTCT  
GCCTTTCCAACAATTTGGCAGAGACATTGCTGACACTACTGATGCTGTCCGTGATCCACAGACACTTGAGATT  
CTTGACATTACACCATGTTCTTTTGGTGGTGTGAGTGTATAACACCAGGAACAAATACTTCTAACCAGGTTG  
CTGTTCTTTATCAGGATGTTAACTGCACAGAAGTCCCTGTTGCTATTCATGCAGATCAACTTACTCCTACTTG  
GCGTGTATTATTCTACAGGTTCTAATGTTTTTCAAACACGTGCAGGCTGTTTAAATAGGGGCTGAACATGTCAAC  
AACTCATATGAGTGTGACATACCCATTGGTGCAGGTATATGCGCTAGTTATCAGACTCAGACTAATTCTCCTC  
GGCGGGCACGTAGTGTAGCTAGTCAATCCATCATTGCCTACACTATGTCACCTGGTGCAGAAAATTCAGTTGC  
TTACTCTAATAACTCTATTGCCATACCCACAAATTTTACTATTAGTGTACCACAGAAAATTCACCAGTGTCT  
ATGACCAAGACATCAGTAGATTGTACAATGTACATTTGTGGTGAATCAACTGAATGCAGCAATCTTTTGTGGC  
AATATGGCAGTTTTTGTACACAATTAACCGTGTCTTAACTGGAATAGCTGTTGAACAAGACAAAAACACCCA  
AGAAGTTTTTGCACAAGTCAAACAATTTACAAAACACCACCAATTAAGATTTTTGGTGGTTTTAATTTTTTCA  
CAAATATTACCAGATCCATCAAACCAAGCAAGAGGTCAATTTATTGAAGATCTACTTTTCAACAAAGTGACAC  
TTGCAGATGCTGGCTTCATCAAACAATATGGTGAATTGCCTTGGTGAATTTGCTGCTAGAGACCTCATTTGTGC  
ACAAAAGTTTAAACGGCCTTACTGTTTTGCCACCTTTGCTCACAGA

>R1\_22

ATGTTTGTTTTTCTTGTTTTATTGCCACTAGTCTCTAGTCAGTGTGTTAATCTTACAACCAGAACTCAATTAC  
CCCCTGCATACACTAATTTCTTACACGTGGTGTATTACCCTGACAAAGTTTTTCAGATCCTCAGTTTTTACA  
TTCAACTCAGGACTTGTCTTACCTTTCTTTTCCAATGTTACTTGGTTCCATGCTATACATGTCTCTGGGACC  
AATGGTACTAAGAGGTTTGATAACCCTGTCTTACCATTTAATGATGGTGTATTATTTTGTCTCCACTGAGAAGT  
CTAACATAATAAGAGGCTGGATTTTTGGTACTACTTTAGATTGCAAGACCCAGTCCCTACTTATTGTTAATAA  
CGTACTAATGTTGTTATTTAAAGTCTGTGAATTTCAATTTTGTAAATGATCCATTTTTGGGTGTTTATTACCAC  
AAAAACAACAAAAGTTGGATGGAAAGTGAGTTCAGAGTTTTATTCTAGTGCGAATAATTGCACCTTTTGAATATG  
TCTCTCAGCCTTTTCTTATGGACCTTGAAGGAAAACAGGGTAATTTCAAAAATCTTAGGGAATTTGTGTTTAA  
GAATATTGATGGTTATTTTTAAAATATATTCTAAGCACACGCCTATTAATTTAGTGCCTGATCTCCCTCAGGGT  
TTTTCGGCTTTAGAACCATTTGGTAGATTTGCCAATAGGTATTAACATCACTAGGTTTCAAACCTTTACTTGCTT  
TACATAGAAGTTATTTGACTCCTGGTGAATCTTCTTTCAGGTTGGACAGCTGGTGTGCAGCTTATTATGTGGG  
TTATCTTCAACCTAGGACTTTTCTATTAAAATATAATGAAAATGGAACCATTCAGATGCTGTAGACTGTGCA  
CTTGACCCTCTCTCAGAAAACAAGTGTACGTTGAAATCCTTCACTGTAGAAAAAGGAATCTATCAAACCTTCTA  
ACTTTAGAGTCCAACCAACAGAATCTATTGTTAGATTTCCATAATTAACAACTTGTGCCCTTTTGGTGAAGT  
TTTTAACGCCACCAGATTTGCATCTGTTTATGCTTGGAACAGGAAGAGAATCAGCAACTGTGTTGCTGATTAT  
TCTGTCCTATATAAATCCGCATCATTTTCCACTTTTAAAGTGTATGGAGTGTCTCCTACTAAATTAATGATC  
TCTGCTTTACTAATGTCTATGCAGATTCATTTGTAATTAGAGGTGATGAAGTCAGACAAATCGCTCCAGGGCA  
AACTGGAAAGATTGCTGATTATAAATTATAAATTACCAGATGATTTTACAGGCTGCGTTATAGCTTGGAAATTCT  
ACAATCTTGATTCTAAGGTTGGTGGTAATTATAATTACCTGTATAGATTGTTTAGGAAGTCTAATCTCAAAC  
CTTTTGAGAGAGATATTTCAACTGAAATCTATCAGGCCGGTAGCACACCTTGTAAATGGTGTGAAGTTTTAA  
TTGTTACTTTTCTTTACAACCATATGGTTTTCCAACCCACTAATGGTGTGGTTACCAACCATAACAGAGTAGTA  
GTACTTTCTTTTGAACTTCTACATGCACCAGCAACTGTTTGTGGACCTAAAAAGTCTACTAATTTGGTTAAAA  
ACAAATGTGTCAATTTCAACTTCAATGGTTTTAACAGGCACAGGTGTTCTTACTGAGTCTAACAAAAAGTTTCT  
GCCTTTCCAACAATTTGGCAGAGACATTGCTGACACTACTGATGCTGTCCGTGATCCACAGACACTTGAGATT  
CTTGACATTACACCATGTTCTTTTGGTGGTGTGAGTGTATAACACCAGGAACAAATACTTCTAACCAGGTTG  
CTGTTCTTTATCAGGATGTTAACTGCACAGAAGTCCCTGTTGCTATTCATGCAGATCAACTTACTCCTACTTG  
GCGTGTATTATTCTACAGGTTCTAATGTTTTTCAAACACGTGCAGGCTGTTTAAATAGGGGCTGAACATGTCAAC  
AACTCATATGAGTGTGACATACCCATTGGTGCAGGTATATGCGCTAGTTATCAGACTCAGACTAATTCTCCTC  
GGCGGGCACGTAGTGTAGCTAGTCAATCCATCATTGCCTACACTATGTCACCTGGTGCAGAAAATTCAGTTGC  
TTACTCTAATAACTCTATTGCCATACCCACAAATTTTACTATTAGTGTACCACAGAAAATTCACCAGTGTCT  
ATGACCAAGACATCAGTAGATTGTACAATGTACATTTGTGGTGAATCAACTGAATGCAGCAATCTTTTGTGGC

AATATGGCAGTTTTTGTACACAATTAACCGTGCTTTAACTGGAATAGCTGTTGAACAAGACAAAAACACCCA  
AGAAGTTTTTGCACAAGTCAAACAAATTTACAAAACACCACCAATTAAGATTTTTGGTGGTTTTAATTTTTTCA  
CAAATATTACCAGATCCATCAAACCAAGCAAGAGGTCAATTTATTGAAGATCTACTTTTCAACAAAGTGACAC  
TTGCAGATGCTGGCTTCATCAAACAATATGGTGATTGCCTTGGTGATATTGCTGCTAGAGACCTCATTTGTGC  
ACAAAAGTTTAAACGGCCTTACTGTTTTGCCACCTTTGCTCACAGA

>R1\_23

ATGTTTGTTTTTCTTGTTTTATTGCCACTAGTCTCTAGTCAGTGTGTTAATCTTACAACCAGAACTCAATTAC  
CCCCTGCATACACTAATTCCTTTCACACGTGGTGTATTACCCTGACAAAGTTTTTCAGATCCTCAGTTTTTACA  
TTCAACTCAGGACTTGTTCTTACCTTTCTTTTCCAATGTTACTTGGTTCCATGCTATAACATGTCTCTGGGACC  
AATGGTACTAAGAGGTTTGATAACCCTGTCTTACCATTTAATGATGGTGTATTATTTGCTTCCACTGAGAAGT  
CTAACATAATAAGAGGCTGGATTTTTGGTACTACTTTAGATTCTGAAGACCCAGTCCCTACTTATTGTTAATAA  
CGCTACTAATGTTGTTATTAAAGTCTGTGAATTTCAATTTTGTAAATGATCCATTTTTGGGTGTTTTATTACCAC  
AAAAACAACAAAAGTTGGATGGAAAGTGAGTTCAGAGTTTATTCTAGTGCGAATAATTGCACCTTTTGAATATG  
TCTCTCAGCCTTTTCTTATGGACCTTGAAGGAAAACAGGGTAATTTCAAAAATCTTAGGGAATTTGTGTTTAA  
GAATATTGATGGTTATTTTTAAAATATATTCTAAGCACACGCCTATTAATTTAGTGCGTGATCTCCCTCAGGGT  
TTTTCGGCTTTAGAACCATTTGGTAGATTTGCCAATAGGTATTAACATCACTAGGTTTTCAAACCTTTACTTGCTT  
TACATAGAAGTTATTTGACTCCTGGTGATTCTTCTTCAGGTTGGACAGCTGGTGCTGCAGCTTATTATGTGGG  
TTATCTTCAACCTAGGACTTTTCTATTTAAAATATAATGAAAATGGAACCATACAGATGCTGTAGACTGTGCA  
CTTGACCCTCTCTCAGAAACAAAGTGACGTTGAAATCCTTCACTGTAGAAAAAGGAATCTATCAAACCTTCTA  
ACTTTAGAGTCCAACCAACAGAATCTATTGTTAGATTTCTAATATTACAACCTTGTGCCCTTTTGGTGAAGT  
TTTTAACGCCACCAGATTTGCATCTGTTTATGCTTGGAACAGGAAGAGAATCAGCAACTGTGTTGCTGATTAT  
TCTGTCTATATAATTCGCATCATTTTTCCACTTTTAAAGTGTATGGAGTGTCTCTACTAAATTAATGATC  
TCTGCTTTACTAATGTCTATGCAGATTCATTTGTAATTAGAGGTGATGAAGTCAGACAAATCGCTCCAGGGCA  
AACTGGAAAGATTGCTGATTATAATTATAAATTACCAGATGATTTTACAGGCTGCGTTATAGCTTGGAAATCT  
ACAATCTTGATTCTAAGGTTGGTGGTAATTATAATTACCTGTATAGATTGTTTAGGAAGTCTAATCTCAAAC  
CTTTTGAGAGAGATATTTCAAATGAAATCTATCAGGCCGGTAGCACACCTTGTAAATGGTGTGGAAGTTTTAA  
TTGTTACTTTTCTTTACAATCATATGGTTTTCCAACCCACTAATGGTGTGGTTACCAACCATAACAGAGTAGTA  
GTACTTTCTTTTGAACCTTCTACATGCACCAGCAACTGTTTGTGGACCTAAAAAGTCTACTAATTTGGTTAAAA  
ACAAATGTGTCAATTTCAACTTCAATGGTTTTAACAGGCACAGGTGTTCTTACTGAGTCTAACAAAAGTTTCT  
GCCTTTCCAACAATTTGGCAGAGACATTGCTGACACTACTGATGCTGTCCGTGATCCACAGACACTTGAGATT  
CTTGACATTACACCATGTTCTTTTGGTGGTGTGAGTGTATAACACCAGGAACAAATACTTCTAACCAGGTTG  
CTGTTCTTTATCAGGATGTTAAGTGCACAGAAGTCCCTGTTGCTATTCATGCAGATCAACTTACTCCTACTTG  
GCGTGTATTATTCTACAGGTTCTAATGTTTTTCAAACACGTGCAGGCTGTTTAATAGGGGCTGAACATGTCAAC  
AACTCATATGAGTGTGACATACCCATTGGTGCAGGTATATGCGTAGTTATCAGACTCAGACTAATTTCTCCTC  
GGCGGGCACGTAGTGTAGCTAGTCAATCCATCATTGCCTACACTATGTCACTTGGTGCAGAAAATTCAGTTGC  
TTACTCTAATAACTCTATTGCCATACCCACAAATTTTACTATTAGTGTACCACAGAAAATTCACCAGTGTCT  
ATGACCAAGACATCAGTAGATTGTACAATGTACATTTGTGGTGATTCAACTGAATGCAGCAATCTTTTGTGTC  
AATATGGCAGTTTTTGTACACAATTAACCGTGCTTTAACTGGAATAGCTGTTGAACAAGACAAAAACACCCA  
AGAAGTTTTTGCACAAGTCAAACAAATTTACAAAACACCACCAATTAAGATTTTTGGTGGTTTTAATTTTTTCA  
CAAATATTACCAGATCCATCAAACCAAGCAAGAGGTCAATTTATTGAAGATCTACTTTTCAACAAAGTGACAC  
TTGCAGATGCTGGCTTCATCAAACAATATGGTGATTGCCTTGGTGATATTGCTGCTAGAGACCTCATTTGTGC  
ACAAAAGTTTAAACGGCCTTACTGTTTTGCCACCTTTGCTCACAGA

>R1\_24

ATGTTTGTTTTTCTTGTTTTATTGCCACTAGTCTCTAGTCAGTGTGTTAATCTTACAACCAGAACTCAATTAC  
CCCCTGCATACACTAATTCCTTTCACACGTGGTGTATTACCCTGACAAAGTTTTTCAGATCCTCAGTTTTTACA  
TTCAACTCAGGACTTGTTCTTACCTTTCTTTTCCAATGTTACTTGGTTCCATGCTATAACATGTCTCTGGGACC  
AATGGTACTAAGAGGTTTGATAACCCTGTCTTACCATTTAATGATGGTGTATTATTTGCTTCCACTGAGAAGT  
CTAACATAATAAGAGGCTGGATTTTTGGTACTACTTTAGATTCTGAAGACCCAGTCCCTACTTATTGTTAATAA  
CGCTACTAATGTTGTTATTAAAGTCTGTGAATTTCAATTTTGTAAATGATCCATTTTTGGGTGTTTTATTACCAC  
AAAAACAACAAAAGTTGGATGGAAAGTGAGTTCAGAGTTTATTCTAGTGCGAATAATTGCACCTTTTGAATATG  
TCTCTCAGCCTTTTCTTATGGACCTTGAAGGAAAACAGGGTAATTTCAAAAATCTTAGGGAATTTGTGTTTAA  
GAATATTGATGGTTATTTTTAAAATATATTCTAAGCACACGCCTATTAATTTAGTGCGTGATCTCCCTCAGGGT  
TTTTCGGCTTTAGAACCATTTGGTAGATTTGCCAATAGGTATTAACATCACTAGGTTTTCAAACCTTTACTTGCTT  
TACATAGAAGTTATTTGACTCCTGGTGATTCTTCTTCAGGTTGGACAGCTGGTGCTGCAGCTTATTATGTGGG



TTATCTTCAACCTAGGACTTTTCTATTAAAATATAATGAAAATGGAACCATTACAGATGCTGTAGACTGTGCA  
CTTGACCCTCTCTCAGAAAACAAAGTGACGTTGAAATCCTTCACTGTAGAAAAAGGAATCTATCAAACCTTCTA  
ACTTTAGAGTCCAACCAACAGAATCTATTGTTAGATTTCCCTAATATTACAAACTTGTGCCCTTTTGGTGAAGT  
TTTTAACGCCACCAGATTTGCATCTGTTTATGCTTGGAACAGGAAGAGAATCAGCAACTGTGTTGCTGATTAT  
TCTGTCCTATATAAATCCGCATCATTTTCCACTTTTAAGTGTATGGAGTGTCTCCTACTAAATTAATGATC  
TCTGCTTTACTAATGTCTATGCAGATTCATTTGTAATTAGAGGTGATGAAGTCAGACAAATCGCTCCAGGGCA  
AACTGGAAAGATTGCTGATTATAAATTATAAATTACCAGATGATTTTACAGGCTGCGTTATAGCTTGGAAATCT  
ACAATCTTGATTCTAAGGTTGGTGGTAATTATAATTACCTGTATAGATTGTTTAGGAAGTCTAATCTCAAAC  
CTTTTGAGAGAGATATTTCAACTGAAATCTATCAGGCCGGTAGCACACCTTGTAAATGGTGTGAAGGTTTTAA  
TTGTTACTTTTCTTTACAATCATATGGTTTTCCAACCCACTAATGGTGTGGTTACCAACCATAACAGAGTAGTA  
GTACTTTCTTTTGAACTTCTACATGCACCAGCAACTGTTTGTGGACCTAAAAAGTCTACTAATTTGGTTAAAA  
ACAAATGTGTCAATTTCAACTTCAATGGTTAACAGGCACAGGTGTTCTTACTGAGTCTAACAAAAAGTTTCT  
GCCTTTCCAACAATTTAGCAGAGACATTGCTGACACTACTGATGCTGTCCGTGATCCACAGACACTTGAGATT  
CTTGACATTACACCATGTTCTTTTGGTGGTGTGAGTGTATAACACCAGGAACAAATACTTCTAACCAGGTTG  
CTGTTCTTTATCAGGATGTTAACTGCACAGAAGTCCCTGTTGCTATTCATGCAGATCAACTTACTCCTACTTG  
GCGTGTATTATTCTACAGGTTCTAATGTTTTTCAAACACGTGCAGGCTGTTTAATAGGGGCTGAACATGTCAAC  
AACTCATATGAGTGTGACATACCCATTGGTGCAGGTATATGCGCTAGTTATCAGACTCAGACTAATTCTCCTC  
GGCGGGCACGTAGTGTAGCTAGTCAATCCATCATTGCCCTACACTATGTCACCTGGTGCAGAAAATTCAGTTGC  
TTACTCTAATAACTCTATTGCCATACCCACAAATTTTACTATTAGTGTACCACAGAAAATCTACCAGTGTCT  
ATGACCAAGACATCAGTAGATTGTACAATGTACATTTGTGGTGAATCAACTGAATGCAGCAATCTTTTGTTC  
AATATGGCAGTTTTTGTACACAATTAACCGTGTCTTAACTGGAATAGCTGTTGAACAAGACAAAAACACCCA  
AGAAGTTTTTGCACAAGTCAAACAATTTACAAAACACCACCAATTAAGATTTTTGGTGGTTTTAATTTTTTCA  
CAAATATTACCAGATCCATCAAACCAAGCAAGAGGTCAATTTATTGAAGATCTACTTTTCAACAAAGTGACAC  
TTGCAGATGCTGGCTTCATCAAACAATATGGTGAATTGCCTTGGTGATATTGCTGCTAGAGACCTCATTTGTGC  
ACAAAAGTTAACGGCCTTACTGTTTTGCCACCTTTGCTCACAGA

>R1\_25

ATGTTTGTTTTTCTTGTTTTTATTGCCACTAGTCTCTAGTCAGTGTGTTAATCTTACAACCAGAACTCAATTAC  
CCCCTGCATACACTAATTCTTTCACACGTGGTGTTTATTACCCTGACAAAGTTTTTCAGATCCTCAGTTTTACA  
TTCAACTCAGGACTTGTCTTACCTTTCTTTTCCAATGTTACTTGGTTCCATGCTATAATGCTCTCTGGGACC  
AATGGTACTAAGAGGTTTGATAACCCTGTCTTACCATTTAATGATGGTGTTTATTTTTGCTTCCACTGAGAAGT  
CTAACATAATAAGAGGCTGGATTTTTGGTACTACTTTAGATTGGAAGACCCAGTCCCTACTTATTGTTAATAA  
CGCTACTAATGTTGTTATTTAAAGTCTGTGAATTTCAATTTTGTAAATGATCCATTTTTGGGTGTTTATTACCAC  
AAAAACAACAAAAGTTGGATGGAAAGTGAGTTCAGAGTTTATTCTAGTGCGAATAATTGCATTTTTGAATATG  
TCTCTCAGCCTTTTCTTATGGACCTTGAAGGAAAACAGGGTAATTTCAAAAATCTTAGGGAATTTGTGTTAA  
GAATATTGATGGTTATTTTTAAAATATATTCTAAGCACACGCCTATTAATTTAGTGCCTGATCTCCCTCAGGGT  
TTTTCGGCTTTAGAACCATTGGTAGATTTGCCAATAGGTATTAACATCACTAGGTTTCAAACCTTACTTGCTT  
TACATAGAAGTTATTTGACTCCTGGTGAATCTTCTTTCAGGTTGGACAGCTGGTGTGCAGCTTATTATGTGGG  
TTATCTTCAACCTAGGACTTTTCTATTAAAATATAATGAAAATGGAACCATTACAGATGCTGTAGACTGTGCA  
CTTGACCCTCTCTCAGAAAACAAAGTGACGTTGAAATCCTTCACTGTAGAAAAAGGAATCTATCAAACCTTCTA  
ACTTTAGAGTCCAACCAACAGAATCTATTGTTAGATTTCCCTAATATTACAAACTTGTGCCCTTTTGGTGAAGT  
TTTTAACGCCACCAGATTTGCATCTGTTTATGCTTGGAACAGGAAGAGAATCAGCAACTGTGTTGCTGATTAT  
TCTGTCCTATATAAATCCGCATCATTTTCCACTTTTAAGTGTATGGAGTGTCTCCTACTAAATTAATGATC  
TCTGCTTTACTAATGTCTATGCAGATTCATTTGTAATTAGAGGTGATGAAGTCAGACAAATCGCTCCAGGGCA  
AACTGGAAAGATTGCTGATTATAAATTATAAATTACCAGATGATTTTACAGGCTGCGTTATAGCTTGGAAATCT  
ACAATCTTGATTCTAAGGTTGGTGGTAATTATAATTACCTGTATAGATTGTTTAGGAAGTCTAATCTCAAAC  
CTTTTGAGAGAGATATTTCAACTGAAATCTATCAGGCCGGTAGCACACCTTGTAAATGGTGTGAAGGTTTTAA  
TTGTTACTTTTCTTTACAATCATATGGTTTTCCAACCTACTAATGGTGTGGTTACCAACCATAACAGAGTAGTA  
GTACTTTCTTTTGAACTTCTACATGCACCAGCAACTGTTTGTGGACCTAAAAAGTCTACTAATTTGGTTAAAA  
ACAAATGTGTCAATTTCAACTTCAATGGTTAACAGGCACAGGTGTTCTTACTGAGTCTAACAAAAAGTTTCT  
GCCTTTCCAACAATTTGGCAGAGACATTGCTGACACTACTGATGCTGTCCGTGATCCACAGACACTTGAGATT  
CTTGACATTACACCATGTTCTTTTGGTGGTGTGAGTGTATAACACCAGGAACAAATACTTCTAACCAGGTTG  
CTGTTCTTTATCAGGATGTTAACTGCACAGAAGTCCCTGTTGCTATTCATGCAGATCAACTTACTCCTACTTG  
GCGTGTATTATTCTACAGGTTCTAATGTTTTTCAAACACGTGCAGGCTGTTTAATAGGGGCTGAACATGTCAAC  
AACTCATATGAGTGTGACATACCCATTGGTGCAGGTATATGCGCTAGTTATCAGACTCAGACTAATTCTCCTC

GGCGGGCACGTAGTGTAGCTAGTCAATCCATCATTGCCTACACTATGTCACTTGGTGCAGAAAATTCAGTTGC  
TTACTCTAATAACTCTATTGCCATACCCACAAATTTTACTATTAGTGTACCACAGAAAATTCACCAGTGTCT  
ATGACCAAGACATCAGTAGATTGTACAATGTACATTTGTGGTGATTCAACTGAATGCAGCAATCTTTTGTTC  
AATATGGCAGTTTTTGTACACAATTAACCGTGCTTTAACTGGAATAGCTGTTGAACAAGACAAAAACACCCA  
AGAAGTTTTTGCACAAGTCAAACAAATTTACAAAACACCACCAATTAAGATTTTTGGTGGTTTTAATTTTTCA  
CAAATATTACCAGATCCATCAAACCAAGCAAGAGGTCAATTTATTGAAGATCTACTTTTCAACAAAGTGACAC  
TTGCAGATGCTGGCTTCATCAAACAATATGGTGATTGCCTTGGTGATATTGCTGCTAGAGACCTCATTTGTGC  
ACAAAAGTTTAAACGGCCTTACTGTTTTGCCACCTTTGCTCACAGA

>R1\_26

ATGTTTGTTTTTCTTGTATTGCCACTAGTCTCTAGTCAGTGTGTTAATCTTACAACCAGAACTCAATTAC  
CCCCTGCATACACTAATCTTTCACACGTGGTGTATTACCCTGACAAAGTTTTTCAGATCCTCAGTTTTTACA  
TTCAACTCAGGACTTGTCTTACCTTTCTTTTCCAATGTTACTTGGTTCCATGCTATAACATGTCTCTGGGACC  
AATGGTACTAAGAGGTTTGATAACCCTGTCTACCATTTAATGATGGTGTATTATTTGCTTCCACTGAGAAGT  
CTAACATAATAAGAGGCTGGATTTTTGGTACTACTTTAGATTGCAAGACCCAGTCCCTACTTATTGTTAATAA  
CGTACTAATGTTGTTATTAAGTCTGTGAATTTCAATTTTGTAAATGATCCATTTTTGGGTGTTTATTACCAC  
AAAAACAACAAAAGTTGGATGGAAAGTGAGTTCAGAGTTTATTCTAGTGCGAATAATTGCACCTTTGAATATG  
TCTCTCAGCCTTTTCTTATGGACCTTGAAGGAAAACAGGGTAATTTCAAAAATCTTAGGGAATTTGTGTTTAA  
GAATATTGATGGTTATTTTAAAATATATTCTAAGCACACGCCTATTAATTTAGTGCCTGATCTCCCTCAGGGT  
TTTTCGGCTTTAGAACCATTTGGTAGATTTGCCAATAGGTATTAACATCACTAGGTTTCAAACCTTTACTTGCTT  
TACATAGAAGTTATTTGACTCCTGGTGATTCTTCTTCAGTTGGACAGCTGGTGCTGCAGCTTATTATGTGGG  
TTATCTTCAACCTAGGACTTTTCTATTAATAATAATGAAAATGGAACCATACAGATGCTGTAGACTGTGCA  
CTTGACCCTCTCTCAGAAACAAAGTGTACGTTGAAATCCTTCACTGTAGAAAAGGAATCTATCAAACCTTCTA  
ACTTTAGAGTCCAACCAACAGAATCTATTGTTAGATTTCTAATATTACAACTTGTGCCCTTTTGGTGAAGT  
TTTTAACGCCACCAGATTTGCATCTGTTTATGCTTGGAACAGGAAGAGAATCAGCAACTGTGTTGCTGATTAT  
TCTGTCTATATAATTCCGCATCATTTTCCACTTTTAAAGTGTATGGAGTGTCTCCTACTAAATTAATGATC  
TCTGCTTTACTAATGTCTATGCAGATTCATTTGTAATTAGAGGTGATGAAGTCAGACAAATCGCTCCAGGGCA  
AACTGGAAAGATTGCTGATTATAATTATAAATTACCAGATGATTTTACAGGCTGCGTTATAGCTTGGAAATCT  
ACAATCTTGATTCTAAGGTTGGTGGTAATTATAATTACCGGTATAGATTGTTTAGGAAGTCTAATCTCAAAC  
CTTTTGAGAGAGATATTTCAACTGAAATTTATCAGGCCGGTAGCACACCTTGTAAATGGTGTGGAAGTTTTAA  
TTGTTACTTTTCTTTACAATCATATGGTTTTCCAACCCACTAATGGTGTGGTTACCAACCATAACAGAGTAGTA  
GTACTTTCTTTTGAACCTTCTACATGCACCAGCAACTGTTTGTGGACCTAAAAAGTCTACTAATTTGGTTAAAA  
ACAAATGTGTCAATTTCAACTTCAATGGTTTAAACAGGCACAGGTGTTCTTACTGAGTCTAACAAAAGTTTCT  
GCCTTTCCAACAATTTGGCAGAGACATTGCTGACACTACTGATGCTGTCCGTGATCCACAGACACTTGAGATT  
CTTGACATTACACCATGTTCTTTTGGTGGTGTGAGTGTATAACACCAGGAACAAATACTTCTAACCAGGTTG  
CTGTTCTTTATCAGGATGTTAACTGCACAGAAGTCCCTGTTGCTATTCATGCAGATCAACTTACTCCTACTTG  
GCGTGTATTATTCTACAGGTTCTAATGTTTTTCAAACACGTGCAGGCTGTTTAAATAGGGGCTGAACATGTCAAC  
AACTCATATGAGTGTGACATACCCATTGGTGCAGGTATATGCGTAGTTATCAGACTCAGACTAATTTCTCCTC  
GGCGGGCACGTAGTGTAGCTAGTCAATCCATCATTGCCTACACTATGTCACTTGGTGCAGAAAATTCAGTTGC  
TTACTCTAATAACTCTATTGCCATACCCACAAATTTTACTATTAGTGTACCACAGAAAATTCACCAGTGTCT  
ATGACCAAGACATCAGTAGATTGTACAATGTACATTTGTGGTGATTCAACTGAATGCAGCAATCTTTTGTTC  
AATATGGCAGTTTTTGTACACAATTAACCGTGCTTTAACTGGAATAGCTGTTGAACAAGACAAAAACACCCA  
AGAAGTTTTTGCACAAGTCAAACAAATTTACAAAACACCACCAATTAAGATTTTTGGTGGTTTTAATTTTTCA  
CAAATATTACCAGATCCATCAAACCAAGCAAGAGGTCAATTTATTGAAGATCTACTTTTCAACAAAGTGACAC  
TTGCAGATGCTGGCTTCATCAAACAATATGGTGATTGCCTTGGTGATATTGCTGCTAGAGACCTCATTTGTGC  
ACAAAAGTTTAAACGGCCTTACTGTTTTGCCACCTTTGCTCACAGA

>R1\_27

ATGTTTGTTTTTCTTGTATTGCCACTAGTCTCTAGTCAGTGTGTTAATCTTACAACCAGAACTCAATTAC  
CCCCTGCATACACTAATCTTTCACACGTGGTGTATTACCCTGACAAAGTTTTTCAGATCCTCAGTTTTTACA  
TTCAACTCAGGACTTGTCTTACCTTTCTTTTCCAATGTTACTTGGTTCCATGCTATAACATGTCTCTGGGACC  
AATGGTACTAAGAGGTTTGATAACCCTGTCTACCATTTAATGATGGTGTATTATTTGCTTCCACTGAGAAGT  
CTAACATAATAAGAGGCTGGATTTTTGGTACTACTTTAGATTGCAAGACCCAGTCCCTACTTATTGTTAATAA  
CGTACTAATGTTGTTATTAAGTCTGTGAATTTCAATTTTGTAAATGATCCATTTTTGGGTGTTTATTACCAC  
AAAAACAACAAAAGTTGGATGGAAAGTGAGTTCAGAGTTTATTCTAGTGCGAATAATTGCACCTTTGAATATG  
TCTCTCAGCCTTTTCTTATGGACCTTGAAGGAAAACAGGGTAATTTCAAAAATCTTAGGGAATTTGTGTTTAA

GAATATTGATGGTTATTTTAAAATATATTCTAAGCACACGCCTATTAATTTAGTGCGTGATCTCCCTCAGGGT  
TTTTCGGCTTTAGAACCATTTGGTAGATTTGCCAATAGGTATTAACATCACTAGGTTTCAAACCTTTACTTGCTT  
TACATAGAAGTTATTTGACTCCTGGTGATTCTTCTTCAGGTTGGACAGCTGGTGCTGCAGCTTATTATGTGGG  
TTATCTTCAACCTAGGACTTTTCTATTAAAATATAATGAAAATGGAACCATTACAGATGCTGTAGACTGTGCA  
CTTGACCCTCTCTCAGAAAACAAAGTGTACGTTGAAATCCTTCAGTGTAGAAAAAGGAATCTATCAAACCTTCTA  
ACTTTAGAGTCCAACCAACAGAATCTATTGTTAGATTTCCCTAATATTACAACTTGTGCCCTTTTGGTGAAGT  
TTTTAACGCCACCAGATTTGCATCTGTTTATGCTTGGAACAGGAAGAGAATCAGCAACTGTGTTGCTGATTAT  
TCTGTCCTATATAATTCGCATCATTTTCCACTTTTAAGTGTATGGAGTGTCTCCTACTAAATTAATGATC  
TCTGCTTTACTAATGTCTATGCAGATTCATTTGTAATTAGAGGTGATGAAGTCAGACAAATCGCTCCAGGGCA  
AACTGGAAAGATTGCTGATTATAATTATAAATTACCAGATGATTTTACAGGCTGCGTTATAGCTTGGAAATCT  
ACAATCTTGATTCTAAGGTTGGTGGTAATTATAATTACCTGTATAGATTGTTTAGGAAGTCTAATCTCAAAC  
CTTTTGAGAGAGATATTTCAACTGAAATCTATCAGGCCGGTAGCAAACCTTGTAAATGGTGTGAAAGTTTTAA  
TTGTTACTTTTCTTTACAATCATATGGTTTTCCAACCCACTAATGGTGTGGTTACCAACCATACAGAGTAGTA  
GTACTTTCTTTTGAACTTCTACATGCACCAGCAACTGTTTGTGGACCTAAAAAGTCTACTAATTTGGTTAAAA  
ACAAATGTGTCAATTTCAACTTCAATGGTTTTAACAGGCACAGGTGTTCTTACTGAGTCTAACAAAAAGTTTCT  
GCCTTTTCAACAATTTGGCAGAGACATTGCTGACACTACTGATGCTGTCCGTGATCCACAGACACTTGAGATT  
CTTGACATTACACCATGTTCTTTTGGTGGTGTGAGTGTATAACACCAGGAACAAATACTTCTAACCAGGTTG  
CTGTTCTTTATCAGGATGTTAACTGCACAGAAGTCCCTGTTGCTATTCATGCAGATCAACTTACTCCTACTTG  
GCGTGTATTTACTACAGTTCTAATGTTTTTCAAACACGTGCAGGCTGTTTAAATAGGGGCTGAACATGTCAAC  
AACTCATATGAGTGTGACATACCCATTGGTGCAGGTATATGCGCTAGTTATCAGACTCAGACTAATTTCTCCTC  
GGCGGGCACGTAGTGTAGCTAGTCAATCCATCATTGCCCTACACTATGTCACCTGGTGCAGAAAATTCAGTTGC  
TTACTCTAATAACTCTATTGCCATACCCACAAATTTTACTATTAGTGTACCACAGAAAATCTACCAGTGTCT  
ATGACCAAGACATCAGTAGATTGTACAATGTACATTTGTGGTGATTCAACTGAATGCAGCAATCTTTTGTTC  
AATATGGCAGTTTTTGTACACAATTAACCGTGCTTTAACTGGAATAGCTGTTGAACAAGACAAAAACACCCA  
AGAAGTTTTTGCACAAGTCAAACAAATTTACAAAACACCACCAATTAAGATTTTTGGTGGTTTTAATTTTTTCA  
CAAATATTACCAGATCCATCAAACCAAGCAAGAGGTCAATTTATTGAAGATCTACTTTTCAACAAAGTGACAC  
TTGCAGATGCTGGCTTCATCAAACAATATGGTGATTGCCTTGGTGATATTGCTGCTAGAGACCTCATTTGTGC  
ACAAAAGTTTTAACGGCTTACTGTTTTGCCACCTTTGCTCACAGA

>R1\_28

ATGTTTGTTTTTCTTGTTTTATTGCCACTAGTCTCTAGTCAGTGTGTTAATCTTACAACCAGAACTCAATTAC  
CCCCTGCATACACTAATTTCTTTCACACGTGGTGTATTACCCTGACAAAGTTTTTCAGATCCTCAGTTTTACA  
TTCAACTCAGGACTTGTTCCTTACCTTTCTTTTCCAATGTTACTTGGTTCCATGCTATAATGCTCTGTTGACC  
AATGGTACTAAGAGGTTTGATAACCCTGTCTTACCATTAAATGATGGTGTATTATTTGCTTCCACTGAGAAGT  
CTAACATAATAAGAGGCTGGATTTTTGGTACTACTTTAGATTGCAAGACCCAGTCCCTACTTATTGTTAATAA  
CGTACTAATGTTGTTATTAAAGTCTGTGAATTTCAATTTTGTAAATGATCCATTTTTGGGTGTTTATTACCAC  
AAAAACAACAAAAGTTGGATGGAAAGTGAGTTCAGAGTTTATTCTAGTGCGAATAATTGCACCTTTTGAATATG  
TCTCTCAGCCTTTTCTTATGGACCTTGAAGGAAAACAGGGTAATTTCAAAAATCTTAGGGAATTTGTGTTAA  
GAATATTGATGGTTATTTTAAAATATATTCTAAGCACACGCCTATTAATTTAGTGCGTGATCTCCCTCAGGGT  
TTTTCGGCTTTAGAACCATTTGGTAGATTTGCCAATAGGTATTAACATCACTAGGTTTCAAACCTTTACTTGCTT  
TACATAGAAGTTATTTGACTCCTGGTGATTCTTCTTCAGGTTGGACAGCTGGTGCTGCAGCTTATTATGTGGG  
TTATCTTCAACCTAGGACTTTTCTATTAAAATATAATGAAAATGGAACCATTACAGATGCTGTAGACTGTGCA  
CTTGACCCTCTCTCAGAAAACAAAGTGTACGTTGAAATCCTTCAGTGTAGAAAAAGGAATCTATCAAACCTTCTA  
ACTTTAGAGTCCAACCAACAGAATCTATTGTTAGATTTCCCTAATATTACAACTTGTGCCCTTTTGGTGAAGT  
TTTTAACGCCACCAGATTTGCATCTGTTTATGCTTGGAACAGGAAGAGAATCAGCAACTGTGTTGCTGATTAT  
TCTGTCCTATATAATTCGCATCATTTTCCACTTTTAAGTGTATGGAGTGTCTCCTACTAAATTAATGATC  
TCTGCTTTACTAATGTCTATGCAGATTCATTTGTAATTAGAGGTGATGAAGTCAGACAAATCGCTCCAGGGCA  
AACTGGAAAGATTGCTGATTATAATTATAAATTACCAGATGATTTTACAGGCTGCGTTATAGCTTGGAAATCT  
ACAATCTTGATTCTAAGGTTGGTGGTAATTATAATTACCTGTATAGATTGTTTAGGAAGTCTAATCTCAAAC  
CTTTTGAGAGAGATATTTCAACTGAAATCTATCAGGCCGGTAGCACACCTTGTAAATGGTGTGAAAGTTTTAA  
TTGTTACTTTTCTTTACAATCATATGGTTTTCCAACCCACTAATGGTGTGGTTACCAACCATATAGAGTAGTA  
GTACTTTCTTTTGAACTTCTACATGCACCAGCAACTGTTTGTGGACCTAAAAAGTCTACTAATTTGGTTAAAA  
ACAAATGTGTCAATTTCAACTTCAATGGTTTTAACAGGCACAGGTGTTCTTACTGAGTCTAACAAAAAGTTTCT  
GCCTTTTCAACAATTTGGCAGAGACATTGCTGACACTACTGATGCTGTCCGTGATCCACAGACACTTGAGATT  
CTTGACATTACACCATGTTCTTTTGGTGGTGTGAGTGTATAACACCAGGAACAAATACTTCTAACCAGGTTG

CTGTTCTTTATCAGGATGTTAACTGCACAGAAGTCCCTGTTGCTATTCATGCAGATCAACTTACTCCTACTTG  
GCGTGTTTTATTCTACAGGTTCTAATGTTTTTCAAACACGTGCAGGCTGTTTAATAGGGGCTGAACATGTCAAC  
AACTCATATGAGTGTGACATACCCATTGGTGCAGGTATATGCGCTAGTTATCAGACTCAGACTAATTCTCCTC  
GGCGGGCACGTAGTGTAGCTAGTCAATCCATCATTGCCTACACTATGTCACCTGGTGCAGAAAATTCAGTTGC  
TTACTCTAATAACTCTATTGCCATACCCACAAATTTTACTATTAGTGTACCACAGAAAATCTACCAGTGTCT  
ATGACCAAGACATCAGTAGATTGTACAATGTACATTTGTGGTGATTCAACTGAATGCAGCAATCTTTTGTTC  
AATATGGCAGTTTTTGTACACAATTAACCGTGCCTTAACTGGAATAGCTGTTGAACAAGACAAAAACACCCA  
AGAAGTTTTTGCACAAGTCAAACAAATTTACAAAACACCACCAATTAAGATTTTTGGTGGTTTTAATTTTTCA  
CAAATATTACCAGATCCATCAAACCAAGCAAGAGGTCAATTTATTGAAGATCTACTTTTCAACAAAGTGACAC  
TTGCAGATGCTGGCTTCATCAAACAATATGGTGAATTGCCTGGTGTATATTGCTGCTAGAGACCTCATTTGTGC  
ACAAAAGTTTAAACGGCCTTACTGTTTTGCCACCTTTGCTCACAGA

\* Region 2 (R2, aal-250)

>R2\_1

ATGTTTGTTTTTCTTGTTTTATTGCCACTAGTCTCTAGTCAGTGTGTTAATCTTACAACCAGAACTCAATTAC  
CCCCTGCATACACTAATTCTTTCACACGTGGTGTATTACCCTGACAAAGTTTTTCAGATCCTCAGTTTTACA  
TTCAACTCAGGACTTGTTCTTACCTTTCTTTTCCAATGTTACTTGGTTCCATGCTATACATGTCTCTGGGACC  
AATGGTACTAAGAGGTTTGATAACCCTGTCCTACCATTTAATGATGGTGTATTATTTGCTTCCACTGAGAAGT  
CTAACATAATAAGAGGCTGGATTTTTGGTACTACTTTAGATTGCAAGACCCAGTCCCTACTTATTGTTAATAA  
CGCTACTAATGTTGTTATTAAAGTCTGTGAATTTCAATTTTGTAAATGATCCATTTTTGGGTGTTTATTACCAC  
AAAAACAACAAAAGTTGGATGGAAAGTGAGTTCAGAGTTTATTCTAGTGCGAATAATTGCACTTTTGAATATG  
TCTCTCAGCCTTTTCTTATGGACCTTGAAGGAAAACAGGGTAATTTCAAAAATCTTAGGGAATTTGTGTTAA  
GAATATTGATGGTTATTTTAAAATATATTCTAAGCACACGCCTATTAATTTAGTGCGTGATCTCCCTCAGGGT  
TTTTCGGCTTTAGAACCATTTGGTAGATTTGCCAATAGGTATTAACATCACTAGGTTTTCAAACCTTTACTTGCTT  
TACATAGAAGTTATTTGACT

>R2\_2

ATGTTTGTTTTTCTTGTTTTATTGCCACTAGTCTCTAGTCAGTGTGTTAATCTTACAACCAGAACTCAATTAC  
CCCCTGCATACACTAATTCTTTCACACGTGGTGTATTACCCTGACAAAGTTTTTTCAGATCCTCAGTTTTACA  
TTCAACTCAGGACTTGTTCTTACCTTTCTTTTCCAATGTTACTTGGTTCCATGCTATACATTTTCTCTGGGACC  
AATGGTACTAAGAGGTTTGATAACCCTGTCCTACCATTTAATGATGGTGTATTATTTGCTTCCACTGAGAAGT  
CTAACATAATAAGAGGCTGGATTTTTGGTACTACTTTAGATTGCAAGACCCAGTCCCTACTTATTGTTAATAA  
CGCTACTAATGTTGTTATTAAAGTCTGTGAATTTCAATTTTGTAAATGATCCATTTTTGGGTGTTTATTACCAC  
AAAAACAACAAAAGTTGGATGGAAAGTGAGTTCAGAGTTTATTCTAGTGCGAATAATTGCACTTTTGAATATG  
TCTCTCAGCCTTTTCTTATGGACCTTGAAGGAAAACAGGGTAATTTCAAAAATCTTAGGGAATTTGTGTTAA  
GAATATTGATGGTTATTTTAAAATATATTCTAAGCACACGCCTATTAATTTAGTGCGTGATCTCCCTCAGGGT  
TTTTCGGCTTTAGAACCATTTGGTAGATTTGCCAATAGGTATTAACATCACTAGGTTTTCAAACCTTTACTTGCTT  
TACATAGAAGTTATTTGACT

>R2\_3

ATGTTTGTTTTTCTTGTTTTATTGCCACTAGTCTCTAGTCAGTGTGTTAATCTTACAACCAGAACTCAATTAC  
CCTCTGCATACACTAATTCTTTCACACGTGGTGTATTACCCTGACAAAGTTTTTCAGATCCTCAGTTTTACA  
TTCAACTCAGGACTTGTTCTTACCTTTCTTTTCCAATGTTACTTGGTTCCATGCTATACATGTCTCTGGGACC  
AATGGTACTAAGAGGTTTGATAACCCTGTCCTACCATTTAATGATGGTGTATTATTTGCTTCCACTGAGAAGT  
CTAACATAATAAGAGGCTGGATTTTTGGTACTACTTTAGATTGCAAGACCCAGTCCCTACTTATTGTTAATAA  
CGCTACTAATGTTGTTATTAAAGTCTGTGAATTTCAATTTTGTAAATGATCCATTTTTGGGTGTTTATTACCAC  
AAAAACAACAAAAGTTGGATGGAAAGTGAGTTCAGAGTTTATTCTAGTGCGAATAATTGCACTTTTGAATATG  
TCTCTCAGCCTTTTCTTATGGACCTTGAAGGAAAACAGGGTAATTTCAAAAATCTTAGGGAATTTGTGTTAA  
GAATATTGATGGTTATTTTAAAATATATTCTAAGCACACGCCTATTAATTTAGTGCGTGATCTCCCTCAGGGT  
TTTTCGGCTTTAGAACCATTTGGTAGATTTGCCAATAGGTATTAACATCACTAGGTTTTCAAACCTTTACTTGCTT  
TACATAGAAGTTATTTGACT

>R2\_4

ATGTTTGTTTTTCTTGTTTTATTGCCACTAGTCTCTAGTCAGTGTGTTAATCTTACAACCAGAACTCAATTAC  
CCCCTGCATACACTAATTCTTTCACACGTGGTGTATTACCCTGACAAAGTTTTTCAGATCCTCAGTTTTACA  
TTCAACTCAGGACTTGTTCTTACCTTTCTTTTCCAATGTTACTTGGTTCCATGCTATACATGTCTCTGGGACC  
AATGGTACTAAGAGGTTTGATAACCCTGTCCTACCATTTAATGATGGTGTATTATTTGCTTCCACTGAGAAGT  
CTAACATAATAAGAGGCTGGATTTTTGGTACTACTTTAGATTGCAAGACCCAGTCCCTACTTATTGTTAATAA

CGCTACTAATGTTGTTATTAAAGTCTGTCAATTTCAATTTTGTAAATGATCCATTTTTGGGTGTTTATTACCAC  
AAAAACAACAAAAGTTGGATGGAAAGTGAGTTCAGAGTTTATTCTAGTGCGAATAATTGCACTTTTGAATATG  
TCTCTCAGCCTTTTCTTATGGACCTTGAAGGAAAACAGGGTAATTTCAAAAATCTTAGGGAATTTGTGTTAA  
GAATATTGATGGTTATTTTAAAATATATTCTAAGCACACGCCTATTAATTTAGTGCGTGATCTCCCTCAGGGT  
TTTTCGGCTTTAGAACCATTTGGTAGATTTGCCAATAGGTATTAACATCACTAGGTTTCAAACCTTTACTTGCTT  
TACATAGAAGTTATTTGACT

>R2\_5

ATGTTTGTTTTTCTTGTTTTATTGCCACTAGTCTCTAGTCAGTGTGTTAATCTTACAACCAGAACTCAATTAC  
CCCCTGCATACACTAATTCCTTTCACACGTGGTGTGTTATTACCCTGACAAAGTTTTTCAGATCCTCAGTTTTACA  
TTCAACTCTGGACTTGTCTTACCTTTCTTTTCCAATGTTACTTGGTTCCATGCTATAACATGTCTCTGGGACC  
AATGGTACTAAGAGGTTTGATAACCCTGTCCTACCATTTAATGATGGTGTGTTATTTTGTCTCCACTGAGAAGT  
CTAACATAATAAGAGGCTGGATTTTTGGTACTACTTTAGATTCTGAAGACCCAGTCCCTACTTATTGTTAATAA  
CGCTACTAATGTTGTTATTAAAGTCTGTGAATTTCAATTTTGTAAATGATCCATTTTTGGGTGTTTATTACCAC  
AAAAACAACAAAAGTTGGATGGAAAGTGAGTTCAGAGTTTATTCTAGTGCGAATAATTGCACTTTTGAATATG  
TCTCTCAGCCTTTTCTTATGGACCTTGAAGGAAAACAGGGTAATTTCAAAAATCTTAGGGAATTTGTGTTAA  
GAATATTGATGGTTATTTTAAAATATATTCTAAGCACACGCCTATTAATTTAGTGCGTGATCTCCCTCAGGGT  
TTTTCGGCTTTAGAACCATTTGGTAGATTTGCCAATAGGTATTAACATCACTAGGTTTCAAACCTTTACTTGCTT  
TACATAGAAGTTATTTGACT

>R2\_6

ATGTTTGTTTTTCTTGTTTTATTGCCACTAGTCTCTAGTCAGTGTGTTAATCTTACAACCAGAACTCAATTAC  
CCCCTGCATACACTAATTCCTTTCACACGTGGTGTGTTATTACCCTGACAAAGTTTTTCAGATCCTCAGTTTTACA  
TTCAACTCAGGACTTGTCTTACCTTTCTTTTCCAATGTTACTTGGTTCCATGCTATAACATGTCTCTGGGACC  
AATGGTACTAAGAGGTTTTATAACCCTGTCCTACCATTTAATGATGGTGTGTTATTTTGTCTCCACTGAGAAGT  
CTAACATAATAAGAGGCTGGATTTTTGGTACTACTTTAGATTCTGAAGACCCAGTCCCTACTTATTGTTAATAA  
CGCTACTAATGTTGTTATTAAAGTCTGTGAATTTCAATTTTGTAAATGATCCATTTTTGGGTGTTTATTACCAC  
AAAAACAACAAAAGTTGGATGGAAAGTGAGTTCAGAGTTTATTCTAGTGCGAATAATTGCACTTTTGAATATG  
TCTCTCAGCCTTTTCTTATGGACCTTGAAGGAAAACAGGGTAATTTCAAAAATCTTAGGGAATTTGTGTTAA  
GAATATTGATGGTTATTTTAAAATATATTCTAAGCACACGCCTATTAATTTAGTGCGTGATCTCCCTCAGGGT  
TTTTCGGCTTTAGAACCATTTGGTAGATTTGCCAATAGGTATTAACATCACTAGGTTTCAAACCTTTACTTGCTT  
TACATAGAAGTTATTTGACT

>R2\_7

ATGTTTGTTTTTCTTGTTTTATTGCCACTAGTCTCTAGTCAGTGTGTTAATCTTACAACCAGAACTCAATTAC  
CCCCTGCATACACTAATTCCTTTCACACGTGGTGTGTTATTACCCTGACAAAGTTTTTCAGATCCTCAGTTTTACA  
TTCAACTCAGGACTTGTCTTACCTTTCTTTTCCAATGTTACTTGGTTCCATGCTATAACATGTCTCTGGGACC  
AATGGTACTAAGAGGTTTGATAACCCTGTCCTACCATTTAATGATGGTGTGTTATTTTGTCTCCACTGAGAAGT  
CTAACATAATAAGAGGCTGGATTTTTGGTACTACTTTAGATTCTGAAGACCCAGTCCCTACTTATTGTTAATAA  
CGCTACTAATGTTGTTATTAAAGTCTGTGAATTTCAATTTTGTAAATGATCCATTTTTGGGTGTTTATTACCAC  
AAAAACAACAAAAGTTGGATGGAAAGTGAGTTAAGAGTTTATTCTAGTGCGAATAATTGCACTTTTGAATATG  
TCTCTCAGCCTTTTCTTATGGACCTTGAAGGAAAACAGGGTAATTTCAAAAATCTTAGGGAATTTGTGTTAA  
GAATATTGATGGTTATTTTAAAATATATTCTAAGCACACGCCTATTAATTTAGTGCGTGATCTCCCTCAGGGT  
TTTTCGGCTTTAGAACCATTTGGTAGATTTGCCAATAGGTATTAACATCACTAGGTTTCAAACCTTTACTTGCTT  
TACATAGAAGTTATTTGACT

>R2\_8

ATGTTTGTTTTTCTTGTTTTATTGCCACTAGTCTCTAGTCAGTGTGTTAATCTTACAACCAGAACTCAATTAC  
CCCCTGCATACACTAATTCCTTTCACACGTGGTGTGTTATTACCCTGACAAAGTTTTTCAGATCCTCAGTTTTACA  
TTCAACTCAGGACTTGTCTTACCTTTCTTTTCCAATGTTACTTGGTTCCATGCTATAACATGTCTCTGGGACC  
AATGGTACTAAGAGGTTTGATAACCCTGTCCTACCATTTAATGATGGTGTGTTATTTTGTCTCCATTGAGAAGT  
CTAACATAATAAGAGGCTGGATTTTTGGTACTACTTTAGATTCTGAAGACCCAGTCCCTACTTATTGTTAATAA  
CGCTACTAATGTTGTTATTAAAGTCTGTGAATTTCAATTTTGTAAATGATCCATTTTTGGGTGTTTATTACCAC  
AAAAACAACAAAAGTTGGATGGAAAGTGAGTTCAGAGTTTATTCTAGTGCGAATAATTGCACTTTTGAATATG  
TCTCTCAGCCTTTTCTTATGGACCTTGAAGGAAAACAGGGTAATTTCAAAAATCTTAGGGAATTTGTGTTAA  
GAATATTGATGGTTATTTTAAAATATATTCTAAGCACACGCCTATTAATTTAGTGCGTGATCTCCCTCAGGGT  
TTTTCGGCTTTAGAACCATTTGGTAGATTTGCCAATAGGTATTAACATCACTAGGTTTCAAACCTTTACTTGCTT  
TACATAGAAGTTATTTGACT

>R2\_9

ATGTTTGTGTTTTCTTGTTTTATTGCCACTAGTCTCTATTCAGTGTGTTAATCTTACAACCAGAACTCAATTAC  
CCCCTGCATACACTAATTCTTTCACACGTGGTGTGTTATTACCCTGACAAAGTTTTTCAGATCCTCAGTTTTACA  
TTCAACTCAGGACTTGTTCTTACCTTTCTTTTCCAATGTTACTTGGTTCCATGCTATAACATGTCTCTGGGACC  
AATGGTACTAAGAGGTTTGATAACCCTGTCCTACCATTTAATGATGGTGTGTTATTTTGGTCTCCACTGAGAAGT  
CTAACATAATAAGAGGCTGGATTTTTGGTACTACTTTAGATTCTGAAGACCCAGTCCCTACTTATTGTTAATAA  
CGCTACTAATGTTGTTATTAAAGTCTGTGAATTTCAATTTTGTAAATGATCCATTTTTGGGTGTTTATTACCAC  
AAAAACAACAAAAGTTGTATGGAAAGTGAGTTCAGAGTTTATTCTAGTGCGAATAATTGCACTTTTGAATATG  
TCTCTCAGCCTTTTCTTATGGACCTTGAAGGAAAACAGGGTAATTTCAAAAATCTTAGGGAATTTGTGTTTAA  
GAATATTGATGGTTATTTTAAAATATATTCTAAGCACACGCCTATTAATTTAGTGCGTGATCTCCCTCAGGGT  
TTTTCGGCTTTAGAACCATTTGGTAGATTTGCCAATAGGTATTAACATCACTAGGTTTTCAAACCTTTACTTGCTT  
TACATAGAAGTTATTTGACT

>R2\_10

ATGTTTGTGTTTTCTTGTTTTATTGCCACTAGTCTCTATTCAGTGTGTTAATCTTACAACCAGAACTCAATTAC  
CCCCTGCATACACTAATTCTTTCACACGTGGTGTGTTATTACCCTGACAAAGTTTTTCAGATCCTCAGTTTTACA  
TTCAACTCAGGACTTGTTCTTACCTTTCTTTTCCAATGTTACTTGGTTCCATGCTATAACATGTCTCTGGGACC  
AATGGTACTAAGAGGTTTGATAACCCTGTCCTACCATTTAATGATGGTGTGTTATTTTGGTCTCCACTGAGAAGT  
CTAACATAATAAGAGGCTGGATTTTTGGTACTACTTTAGATTCTGAAGACCCAGTCCCTACTTATTGTTAATAA  
CGCTACTAATGTTGTTATTAAAGTCTGTGAATTTCAATTTTGTAAATGATCCATTTTT-----  
ACCACAAAACAACAAAAGTTGTATGGAAAGTGAGTTCAGAGTTTATTCTAGTGCGAATAATTGCACTTTTGA  
ATATGTCTCTCAGCCTTTTCTTATGGACCTTGAAGGAAAACAGGGTAATTTCAAAAATCTTAGGGAATTTGTG  
TTTAAGAATATTGATGGTTATTTTAAAATATATTCTAAGCACACGCCTATTAATTTAGTGCGTGATCTCCCTC  
AGGGTTTTTCGGCTTTAGAACCATTTGGTAGATTTGCCAATAGGTATTAACATCACTAGGTTTTCAAACCTTTACT  
TGCTTTACATAGAAGTTATTTGACT

>R2\_11

ATGTTTGTGTTTTCTTGTTTTATTGCCACTAGTCTCTATTCAGTGTGTTAATCTTACAACCAGAACTCAATTAC  
CCTCTGCATACACTAATTCTTTCACACGTGGTGTGTTATTACCCTGACAAAGTTTTTCAGATCCTCAGTTTTACA  
TTCAACTCAGGACTTGTTCTTACCTTTCTTTTCCAATGTTACTTGGTTCCATGCTATAACATGTCTCTGGGACC  
AATGGTACTAAGAGGTTTGATAACCCTGTCCTACCATTTAATGATGGTGTGTTATTTTGGTCTCCACTGAGAAGT  
CTAACATAATAAGAGGCTGGATTTTTGGTACTACTTTAGATTCTGAAGACCCAGTCCCTACTTATTGTTAATAA  
CGCTACTAATGTTGTTATTAAAGTCTGTGAATTTCAATTTTGTAAATGATCCATTTTTGGGTGTTTATTACCAC  
AAAAACAACAAAAGTTGTATGGAAAGTGAGTTCAGAGTTTATTCTAGTGCGAATAATTGCACTTTTGAATATG  
TCTCTCAGCCTTTTCTTATGGACCTTGAAGGAAAACAGGGTAATTTCAAAAATCTTAGGGAATTTGTGTTTAA  
GAATATTGATGGTTATTTTAAAATATATTCTAAGCACACGCCTATTAATTTAGTGCGTGATCTCCCTCAGGGT  
TTTTCGGCTTTAGAACCATTTGGTAGATTTGCCAATAGGTATTAACATCACTAGGTTTTCAAACCTTTACTTGCTT  
TACATAGAAGTTATTTGACT

>R2\_12

ATGTTTGTGTTTTCTTGTTTTATTGCCACTAGTCTCTAGTCTAGTGTGTTAATCTTACAACCAGAACTCAATTAC  
CCCCTGCATACACTAATTCTTTCACACGTGGTGTGTTATTACCCTGACAAAGTTTTTCAGATCCTCAGTTTTACA  
TTCAACTCAGGACTTGTTCTTACCTTTCTTTTCCAATGTTACTTGGTTCCATGCTATAACATGTCTCTGGGACC  
AATGGTACTAAGAGGTTTGATAACCCTGTCCTACCATTTAATGATGGTGTGTTATTTAGCTTCCACTGAGAAGT  
CTAACATAATAAGAGGCTGGATTTTTGGTACTACTTTAGATTCTGAAGACCCAGTCCCTACTTATTGTTAATAA  
CGCTACTAATGTTGTTATTAAAGTCTGTGAATTTCAATTTTGTAAATGATCCATTTTTGGGTGTTTATTACCAC  
AAAAACAACAAAAGTTGGATGGAAAGTGAGTTCAGAGTTTATTCTAGTGCGAATAATTGCACTTTTGAATATG  
TCTCTCAGCCTTTTCTTATGGACCTTGAAGGAAAACAGGGTAATTTCAAAAATCTTAGGGAATTTGTGTTTAA  
GAATATTGATGGTTATTTTAAAATATATTCTAAGCACACGCCTATTAATTTAGTGCGTGATCTCCCTCAGGGT  
TTTTCGGCTTTAGAACCATTTGGTAGATTTGCCAATAGGTATTAACATCACTAGGTTTTCAAACCTTTACTTGCTT  
TACATAGAAGTTATTTGACT
